# Supplementary material for: Global Distribution and Evolution of Mycobacterium bovis Lineages
Source: Front Microbiol. 2020 May 7;11:843. doi: 10.3389/fmicb.2020.00843 (PMC7232559; doi:10.3389/fmicb.2020.00843)
Supplement: Supplementary file 2 [file Table_2.XLSX]

## Sheet: Mbovis genomes
Table S2. Country, host species, accession numbers and literature references of all 1,969 Mycobacterium bovis genomes analyzed.
Country	Host	SRA ID	References
Brazil	capybara	SRR9850824	This study
Brazil	llama	SRR9850830	This study
Brazil	bison	SRR7693912	This study
Brazil	bovine	SRR6705904	Zimpel et al., 2017
Brazil	llama	SRR7693877	This study
Canada	bovine	SRR7240109	Orloski et al., 2018
Canada	bison	SRR6467887	Andrievskaia et al., 2018
Canada	bovine	SRR1791768	USDA-NVSL-DBL
Canada	bovine	SRR6467885	Andrievskaia et al., 2018
Canada	bovine	SRR6467889	Andrievskaia et al., 2018
Canada	bovine	SRR6467893	Andrievskaia et al., 2018
Canada	elk	SRR6467891	Andrievskaia et al., 2018
Eritrea	bovine	SRR5486076	Ghebremariam et al., 2018
Eritrea	bovine	SRR5486073	Ghebremariam et al., 2018
Eritrea	bovine	SRR5486074	Ghebremariam et al., 2018
Eritrea	bovine	SRR5486075	Ghebremariam et al., 2018
Eritrea	bovine	SRR5486077	Ghebremariam et al., 2018
Eritrea	bovine	SRR5486078	Ghebremariam et al., 2018
Eritrea	bovine	SRR5486079	Ghebremariam et al., 2018
Eritrea	bovine	SRR5486080	Ghebremariam et al., 2018
Eritrea	bovine	SRR5486081	Ghebremariam et al., 2018
Eritrea	bovine	SRR5486082	Ghebremariam et al., 2018
Eritrea	bovine	SRR5486083	Ghebremariam et al., 2018
Eritrea	bovine	SRR5486084	Ghebremariam et al., 2018
Eritrea	bovine	SRR5486085	Ghebremariam et al., 2018
Ethiopia	bovine	SRR5486071	Ghebremariam et al., 2018
Ethiopia	bovine	SRR5486072	Ghebremariam et al., 2018
France	bovine	SRR5196685	Branger et al., 2017
France	wilboar	SRR4117155	Branger et al., 2016
Germany	human	ERR550755	Walker et al. 2015
Germany	human	ERR550954	Walker et al. 2015
Germany	human	ERR551009	Walker et al. 2015
Germany	human	ERR551252	Walker et al. 2015
Germany	human	ERR551917	Walker et al. 2015
Germany	human	ERR553061	Walker et al. 2015
Ghana	human	ERR1203064	Otchere et al., 2019
Ghana	human	ERR502499	Otchere et al., 2019
Ghana	human	ERR502526	Otchere et al., 2019
Italy	human	SRR7131025	Cabibbe et al., 2018
Italy	human	SRR7131117	Cabibbe et al., 2018
Malawi	human	MalawiERR161044	Brites et al., 2018
Malawi	human	MalawiERR181980	Brites et al., 2018
Malawi	human	MalawiERR212091	Brites et al., 2018
Mexico	bovine	SRR1792409	Orloski et al., 2018
Mexico	bovine	SRR1792422	Orloski et al., 2018
Mexico	bovine	SRR1792438	USDA-NVSL-DBL
Mexico	bovine	SRR1792441	Orloski et al., 2018
Mexico	bovine	SRR1792447	Orloski et al., 2018
Mexico	bovine	SRR1792449	Orloski et al., 2018
Mexico	bovine	SRR1791700	Orloski et al., 2018
Mexico	bovine	SRR1791703	Salvador et al., 2019
Mexico	bovine	SRR1791706	Salvador et al., 2019
Mexico	bovine	SRR1791727	Orloski et al., 2018
Mexico	bovine	SRR1791728	Orloski et al., 2018
Mexico	bovine	SRR1791735	Orloski et al., 2018
Mexico	bovine	SRR1791740	Orloski et al., 2018
Mexico	bovine	SRR1791742	Orloski et al., 2018
Mexico	bovine	SRR1791744	Orloski et al., 2018
Mexico	bovine	SRR1791745	Orloski et al., 2018
Mexico	bovine	SRR1791748	Orloski et al., 2018
Mexico	bovine	SRR1791755	Salvador et al., 2019
Mexico	bovine	SRR1791760	Orloski et al., 2018
Mexico	bovine	SRR1791761	Orloski et al., 2018
Mexico	bovine	SRR1791762	Orloski et al., 2018
Mexico	bovine	SRR1791763	Orloski et al., 2018
Mexico	bovine	SRR1791767	Orloski et al., 2018
Mexico	bovine	SRR1791777	Orloski et al., 2018
Mexico	bovine	SRR1791778	Orloski et al., 2018
Mexico	bovine	SRR1791785	Orloski et al., 2018
Mexico	bovine	SRR1791787	Orloski et al., 2018
Mexico	bovine	SRR1791792	Orloski et al., 2018
Mexico	bovine	SRR1791800	Trost et al., 2016
Mexico	bovine	SRR1791801	Orloski et al., 2018
Mexico	bovine	SRR1791806	Orloski et al., 2018
Mexico	bovine	SRR1791809	Orloski et al., 2018
Mexico	bovine	SRR1791811	Orloski et al., 2018
Mexico	bovine	SRR1791816	Orloski et al., 2018
Mexico	bovine	SRR1791823	Orloski et al., 2018
Mexico	bovine	SRR1791829	Orloski et al., 2018
Mexico	bovine	SRR1791847	Trost et al., 2016
Mexico	bovine	SRR1791861	Trost et al., 2016
Mexico	bovine	SRR1791864	Trost et al., 2016
Mexico	bovine	SRR1791871	Orloski et al., 2018
Mexico	bovine	SRR1791882	Orloski et al., 2018
Mexico	bovine	SRR1791883	Orloski et al., 2018
Mexico	bovine	SRR1791886	USDA-NVSL-DBL
Mexico	bovine	SRR1791890	Orloski et al., 2018
Mexico	bovine	SRR1791891	Orloski et al., 2018
Mexico	bovine	SRR1791893	Orloski et al., 2018
Mexico	bovine	SRR1791913	Orloski et al., 2018
Mexico	bovine	SRR1791927	Orloski et al., 2018
Mexico	bovine	SRR1791937	Orloski et al., 2018
Mexico	bovine	SRR1791946	Orloski et al., 2018
Mexico	bovine	SRR1791951	Orloski et al., 2018
Mexico	bovine	SRR1791952	Orloski et al., 2018
Mexico	bovine	SRR1791955	Orloski et al., 2018
Mexico	bovine	SRR1791956	Salvador et al., 2019
Mexico	bovine	SRR1791962	Orloski et al., 2018
Mexico	bovine	SRR1791969	Trost et al., 2016
Mexico	bovine	SRR1791970	Trost et al., 2016
Mexico	bovine	SRR1791973	Orloski et al., 2018
Mexico	bovine	SRR1791974	Orloski et al., 2018
Mexico	bovine	SRR1791975	Orloski et al., 2018
Mexico	cheese	SRR1791976	Orloski et al., 2018
Mexico	bovine	SRR1791977	Trost et al., 2016
Mexico	bovine	SRR1791987	Trost et al., 2016
Mexico	bovine	SRR1791992	Orloski et al., 2018
Mexico	bovine	SRR1792001	Trost et al., 2016
Mexico	bovine	SRR1792003	Trost et al., 2016
Mexico	bovine	SRR1792013	Orloski et al., 2018
Mexico	bovine	SRR1792015	Orloski et al., 2018
Mexico	bovine	SRR1792016	Orloski et al., 2018
Mexico	bovine	SRR1792026	Orloski et al., 2018
Mexico	bovine	SRR1792028	Orloski et al., 2018
Mexico	bovine	SRR1792031	Orloski et al., 2018
Mexico	bovine	SRR1792033	Orloski et al., 2018
Mexico	bovine	SRR1792036	Trost et al., 2016
Mexico	bovine	SRR1792040	Orloski et al., 2018
Mexico	bovine	SRR1792041	Trost et al., 2016
Mexico	bovine	SRR1792074	Orloski et al., 2018
Mexico	bovine	SRR1792078	Orloski et al., 2018
Mexico	bovine	SRR1792088	Trost et al., 2016
Mexico	bovine	SRR1792117	Orloski et al., 2018
Mexico	bovine	SRR1792132	Trost et al., 2016
Mexico	bovine	SRR1792259	Orloski et al., 2018
Mexico	bovine	SRR1792269	Orloski et al., 2018
Mexico	Bovine	SRR1792279	Orloski et al., 2018
Mexico	Bovine	SRR1792286	Trost et al., 2016
Mexico	Bovine	SRR1792300	Orloski et al., 2018
Mexico	Bovine	SRR1792301	Orloski et al., 2018
Mexico	Bovine	SRR1792307	Orloski et al., 2018
Mexico	Bovine	SRR1792310	USDA-NVSL-DBL
Mexico	Bovine	SRR1792313	Orloski et al., 2018
Mexico	Bovine	SRR1792347	Trost et al., 2016
Mexico	Bovine	SRR1792349	Trost et al., 2016
Mexico	Bovine	SRR1792353	Trost et al., 2016
Mexico	Bovine	SRR1792356	Orloski et al., 2018
Mexico	bovine	SRR5657358	Sandoval-Azuara et al, 2017
Mexico	bovine	SRR5657363	Sandoval-Azuara et al, 2017
Mexico	bovine	SRR5657364	Sandoval-Azuara et al, 2017
Mexico	bovine	SRR5657365	Sandoval-Azuara et al, 2017
Mexico	bovine	SRR5657366	Sandoval-Azuara et al, 2017
Mexico	bovine	SRR5657368	Sandoval-Azuara et al, 2017
Mexico	bovine	SRR5657369	Sandoval-Azuara et al, 2017
Mexico	bovine	SRR5657371	Sandoval-Azuara et al, 2017
Mexico	bovine	SRR5657373	Sandoval-Azuara et al, 2017
Mexico	bovine	SRR5657376	Sandoval-Azuara et al, 2017
Mexico	bovine	SRR5657378	Sandoval-Azuara et al, 2017
Mexico	bovine	SRR5657379	Sandoval-Azuara et al, 2017
Mexico	bovine	SRR5657381	Sandoval-Azuara et al, 2017
Mexico	bovine	SRR5657385	Sandoval-Azuara et al, 2017
Mexico	bovine	SRR5657386	Sandoval-Azuara et al, 2017
Mexico	bovine	SRR5657387	Sandoval-Azuara et al, 2017
Mexico	bovine	SRR5657388	Sandoval-Azuara et al, 2017
Mexico	bovine	SRR5657391	Sandoval-Azuara et al, 2017
Mexico	bovine	SRR5657392	Sandoval-Azuara et al, 2017
Mexico	bovine	SRR5657394	Sandoval-Azuara et al, 2017
Mexico	bovine	SRR5657398	Sandoval-Azuara et al, 2017
Mexico	bovine	SRR5657399	Sandoval-Azuara et al, 2017
Mexico	bovine	SRR5657402	Sandoval-Azuara et al, 2017
Mexico	bovine	SRR5657404	Sandoval-Azuara et al, 2017
Mexico	bovine	SRR5657405	Sandoval-Azuara et al, 2017
Mexico	bovine	SRR5657406	Sandoval-Azuara et al, 2017
Mexico	bovine	SRR5657411	Sandoval-Azuara et al, 2017
Mexico	bovine	SRR5657415	Sandoval-Azuara et al, 2017
Mexico	bovine	SRR5657419	Sandoval-Azuara et al, 2017
Mexico	bovine	SRR5657420	Sandoval-Azuara et al, 2017
Mexico	bovine	SRR5657421	Sandoval-Azuara et al, 2017
Mexico	bovine	SRR5657423	Sandoval-Azuara et al, 2017
Mexico	bovine	SRR5657424	Sandoval-Azuara et al, 2017
Mexico	bovine	SRR5657427	Sandoval-Azuara et al, 2017
Mexico	bovine	SRR5657431	Sandoval-Azuara et al, 2017
Mexico	bovine	SRR5657433	Sandoval-Azuara et al, 2017
Mexico	bovine	SRR5657435	Sandoval-Azuara et al, 2017
Mexico	bovine	SRR5657438	Sandoval-Azuara et al, 2017
Mexico	bovine	SRR5657439	Sandoval-Azuara et al, 2017
Mexico	bovine	SRR5657443	Sandoval-Azuara et al, 2017
Mexico	bovine	SRR5657444	Sandoval-Azuara et al, 2017
Mexico	bovine	SRR5657448	Sandoval-Azuara et al, 2017
Mexico	bovine	SRR5657451	Sandoval-Azuara et al, 2017
Mexico	bovine	SRR5657452	Sandoval-Azuara et al, 2017
Mexico	bovine	SRR5657453	Sandoval-Azuara et al, 2017
Mexico	bovine	SRR5657454	Sandoval-Azuara et al, 2017
Mexico	bovine	SRR5657456	Sandoval-Azuara et al, 2017
Mexico	bovine	SRR5657458	Sandoval-Azuara et al, 2017
Mexico	bovine	SRR5657462	Sandoval-Azuara et al, 2017
Mexico	bovine	SRR5657467	Sandoval-Azuara et al, 2017
Mexico	bovine	SRR5657469	Sandoval-Azuara et al, 2017
Mexico	bovine	SRR5657473	Sandoval-Azuara et al, 2017
Mexico	bovine	SRR5657487	Sandoval-Azuara et al, 2017
Mexico	bovine	SRR5657493	Sandoval-Azuara et al, 2017
Mexico	bovine	SRR5657500	Sandoval-Azuara et al, 2017
Mexico	bovine	SRR5657501	Sandoval-Azuara et al, 2017
Mexico	bovine	SRR5657502	Sandoval-Azuara et al, 2017
Mexico	bovine	SRR5657503	Sandoval-Azuara et al, 2017
Mexico	bovine	SRR5657504	Sandoval-Azuara et al, 2017
Mexico	bovine	SRR5657505	Sandoval-Azuara et al, 2017
Mexico	bovine	SRR5657508	Sandoval-Azuara et al, 2017
Mexico	bovine	SRR5657509	Sandoval-Azuara et al, 2017
Mexico	bovine	SRR5657513	Sandoval-Azuara et al, 2017
Mexico	bovine	SRR5657514	Sandoval-Azuara et al, 2017
Mexico	bovine	SRR5657515	Sandoval-Azuara et al, 2017
Mexico	bovine	SRR5657517	Sandoval-Azuara et al, 2017
Mexico	bovine	SRR5657518	Sandoval-Azuara et al, 2017
Mexico	bovine	SRR5657519	Sandoval-Azuara et al, 2017
Mexico	bovine	SRR5657520	Sandoval-Azuara et al, 2017
Mexico	bovine	SRR5657521	Sandoval-Azuara et al, 2017
Mexico	bovine	SRR5657522	Sandoval-Azuara et al, 2017
Mexico	bovine	SRR5657523	Sandoval-Azuara et al, 2017
Mexico	bovine	SRR5657524	Sandoval-Azuara et al, 2017
Mexico	bovine	SRR5657526	Sandoval-Azuara et al, 2017
Mexico	bovine	SRR5657528	Sandoval-Azuara et al, 2017
Mexico	bovine	SRR7240019	Orloski et al., 2018
Mexico	bovine	SRR7240020	Orloski et al., 2018
Mexico	bovine	SRR7240083	Orloski et al., 2018
Mexico	bovine	SRR7240084	Orloski et al., 2018
Mexico	bovine	SRR7240104	Orloski et al., 2018
Mexico	bovine	SRR7240107	Orloski et al., 2018
Mexico	bovine	SRR7240108	Orloski et al., 2018
Mexico	bovine	SRR7240113	Orloski et al., 2018
Mexico	bovine	SRR7240144	Orloski et al., 2018
Mexico	bovine	SRR7240158	Orloski et al., 2018
Mexico	bovine	SRR7240170	Orloski et al., 2018
Mexico	bovine	SRR7240184	Orloski et al., 2018
Mexico	bovine	SRR7240187	Orloski et al., 2018
Mexico	bovine	SRR7240196	Orloski et al., 2018
Mexico	bovine	SRR7240197	Orloski et al., 2018
Mexico	bovine	SRR7240233	Orloski et al., 2018
Mexico	bovine	SRR7240234	Orloski et al., 2018
Mexico	bovine	SRR7240237	Orloski et al., 2018
Mexico	bovine	SRR7240240	Orloski et al., 2018
Mexico	bovine	SRR7240318	Orloski et al., 2018
Mexico	bovine	SRR7240320	Orloski et al., 2018
Mexico	bovine	SRR7240341	Orloski et al., 2018
Mexico	bovine	SRR7240342	Orloski et al., 2018
Mexico	bovine	SRR7240344	Orloski et al., 2018
Mexico	bovine	SRR7240345	Orloski et al., 2018
Mexico	bovine	SRR7240346	Orloski et al., 2018
Mexico	bovine	SRR7240347	Orloski et al., 2018
Mexico	bovine	SRR7240349	Orloski et al., 2018
Mexico	bovine	SRR7240351	Orloski et al., 2018
Mexico	bovine	SRR7240352	Orloski et al., 2018
Mexico	bovine	SRR7240353	Orloski et al., 2018
Mexico	bovine	SRR7240358	Orloski et al., 2018
Mexico	bovine	SRR7240395	Orloski et al., 2018
Mexico	bovine	SRR7240423	Orloski et al., 2018
Mexico	bovine	SRR7240454	Orloski et al., 2018
Mexico	bovine	SRR7240478	Orloski et al., 2018
Mexico	bovine	SRR7240489	Orloski et al., 2018
Mexico	bovine	SRR7240505	Orloski et al., 2018
Mexico	bovine	SRR7240507	Orloski et al., 2018
Mexico	bovine	SRR7240519	Orloski et al., 2018
Mexico	bovine	SRR1791702	Orloski et al., 2018
Mexico	bovine	SRR1791704	Orloski et al., 2018
Mexico	bovine	SRR1791705	Orloski et al., 2018
Mexico	bovine	SRR1791709	Orloski et al., 2018
Mexico	bovine	SRR1791722	Orloski et al., 2018
Mexico	bovine	SRR1791724	Orloski et al., 2018
Mexico	bovine	SRR1791737	Orloski et al., 2018
Mexico	bovine	SRR1791751	Orloski et al., 2018
Mexico	bovine	SRR1791752	Orloski et al., 2018
Mexico	bovine	SRR1791756	Orloski et al., 2018
Mexico	bovine	SRR1791758	Orloski et al., 2018
Mexico	bovine	SRR1791759	Orloski et al., 2018
Mexico	bovine	SRR1791766	Orloski et al., 2018
Mexico	bovine	SRR1791770	Orloski et al., 2018
Mexico	bovine	SRR1791773	Orloski et al., 2018
Mexico	bovine	SRR1791781	Orloski et al., 2018
Mexico	bovine	SRR1791788	Orloski et al., 2018
Mexico	bovine	SRR1791790	Orloski et al., 2018
Mexico	bovine	SRR1791791	Orloski et al., 2018
Mexico	bovine	SRR1791796	Orloski et al., 2018
Mexico	bovine	SRR1791797	Orloski et al., 2018
Mexico	bovine	SRR1791798	Orloski et al., 2018
Mexico	bovine	SRR1791802	Orloski et al., 2018
Mexico	bovine	SRR1791804	Orloski et al., 2018
Mexico	bovine	SRR1791807	Orloski et al., 2018
Mexico	bovine	SRR1791822	Orloski et al., 2018
Mexico	bovine	SRR1791824	Orloski et al., 2018
Mexico	bovine	SRR1791826	Orloski et al., 2018
Mexico	bovine	SRR1791831	Orloski et al., 2018
Mexico	bovine	SRR1791835	Orloski et al., 2018
Mexico	bovine	SRR1791843	Orloski et al., 2018
Mexico	bovine	SRR1791851	Orloski et al., 2018
Mexico	bovine	SRR1791878	Orloski et al., 2018
Mexico	bovine	SRR1791892	Orloski et al., 2018
Mexico	bovine	SRR1791895	USDA-NVSL-DBL
Mexico	bovine	SRR1791896	USDA-NVSL-DBL
Mexico	bovine	SRR1791900	Orloski et al., 2018
Mexico	bovine	SRR1791903	Orloski et al., 2018
Mexico	bovine	SRR1791907	Orloski et al., 2018
Mexico	bovine	SRR1791916	Orloski et al., 2018
Mexico	bovine	SRR1791923	Orloski et al., 2018
Mexico	bovine	SRR1791924	Orloski et al., 2018
Mexico	bovine	SRR1791926	Orloski et al., 2018
Mexico	bovine	SRR1791928	Orloski et al., 2018
Mexico	bovine	SRR1791938	Orloski et al., 2018
Mexico	bovine	SRR1791939	Orloski et al., 2018
Mexico	bovine	SRR1791942	Orloski et al., 2018
Mexico	bovine	SRR1791945	Orloski et al., 2018
Mexico	bovine	SRR1791953	Orloski et al., 2018
Mexico	bovine	SRR1791954	Orloski et al., 2018
Mexico	bovine	SRR1791959	Orloski et al., 2018
Mexico	bovine	SRR1791960	Orloski et al., 2018
Mexico	bovine	SRR1791989	Orloski et al., 2018
Mexico	bovine	SRR1791998	Orloski et al., 2018
Mexico	bovine	SRR1792005	Orloski et al., 2018
Mexico	bovine	SRR1792020	Orloski et al., 2018
Mexico	bovine	SRR1792027	Orloski et al., 2018
Mexico	bovine	SRR1792029	Orloski et al., 2018
Mexico	bovine	SRR1792035	Orloski et al., 2018
Mexico	bovine	SRR1792039	Orloski et al., 2018
Mexico	bovine	SRR1792063	Orloski et al., 2018
Mexico	bovine	SRR1792064	Orloski et al., 2018
Mexico	bovine	SRR1792065	Orloski et al., 2018
Mexico	bovine	SRR1792066	Orloski et al., 2018
Mexico	bovine	SRR1792071	Orloski et al., 2018
Mexico	bovine	SRR1792072	Orloski et al., 2018
Mexico	bovine	SRR1792099	Orloski et al., 2018
Mexico	bovine	SRR1792118	Orloski et al., 2018
Mexico	bovine	SRR1792151	Orloski et al., 2018
Mexico	bovine	SRR1792155	Orloski et al., 2018
Mexico	bovine	SRR1792158	Orloski et al., 2018
Mexico	bovine	SRR1792162	Orloski et al., 2018
Mexico	bovine	SRR1792171	Orloski et al., 2018
Mexico	bovine	SRR1792172	Orloski et al., 2018
Mexico	bovine	SRR1792241	Orloski et al., 2018
Mexico	bovine	SRR1792245	Orloski et al., 2018
Mexico	bovine	SRR1792281	Orloski et al., 2018
Mexico	bovine	SRR1792298	Orloski et al., 2018
Mexico	bovine	SRR1792302	Orloski et al., 2018
Mexico	bovine	SRR1792328	Orloski et al., 2018
Mexico	bovine	SRR1792329	Orloski et al., 2018
Mexico	bovine	SRR1792330	Orloski et al., 2018
Mexico	bovine	SRR1792343	Orloski et al., 2018
Mexico	bovine	SRR1792345	Orloski et al., 2018
Mexico	bovine	SRR1792354	Orloski et al., 2018
Mexico	bovine	SRR1792357	Orloski et al., 2018
Mexico	bovine	SRR1792358	Orloski et al., 2018
Mexico	bovine	SRR1792363	Orloski et al., 2018
Mexico	bovine	SRR1792369	Orloski et al., 2018
Mexico	bovine	SRR1792384	Orloski et al., 2018
Mexico	bovine	SRR1792410	Orloski et al., 2018
Mexico	bovine	SRR1792445	Orloski et al., 2018
Mexico	bovine	SRR5657359	Sandoval-Azuara et al., 2017
Mexico	bovine	SRR5657360	Sandoval-Azuara et al., 2017
Mexico	bovine	SRR5657361	Sandoval-Azuara et al., 2017
Mexico	bovine	SRR5657362	Sandoval-Azuara et al., 2017
Mexico	bovine	SRR5657367	Sandoval-Azuara et al., 2017
Mexico	bovine	SRR5657370	Sandoval-Azuara et al., 2017
Mexico	bovine	SRR5657372	Sandoval-Azuara et al., 2017
Mexico	bovine	SRR5657374	Sandoval-Azuara et al., 2017
Mexico	bovine	SRR5657377	Sandoval-Azuara et al., 2017
Mexico	bovine	SRR5657380	Sandoval-Azuara et al., 2017
Mexico	bovine	SRR5657382	Sandoval-Azuara et al., 2017
Mexico	bovine	SRR5657383	Sandoval-Azuara et al., 2017
Mexico	bovine	SRR5657384	Sandoval-Azuara et al., 2017
Mexico	bovine	SRR5657390	Sandoval-Azuara et al., 2017
Mexico	bovine	SRR5657395	Sandoval-Azuara et al., 2017
Mexico	bovine	SRR5657397	Sandoval-Azuara et al., 2017
Mexico	bovine	SRR5657403	Sandoval-Azuara et al., 2017
Mexico	bovine	SRR5657407	Sandoval-Azuara et al., 2017
Mexico	bovine	SRR5657412	Sandoval-Azuara et al., 2017
Mexico	bovine	SRR5657413	Sandoval-Azuara et al., 2017
Mexico	bovine	SRR5657416	Sandoval-Azuara et al., 2017
Mexico	bovine	SRR5657417	Sandoval-Azuara et al., 2017
Mexico	bovine	SRR5657418	Sandoval-Azuara et al., 2017
Mexico	bovine	SRR5657422	Sandoval-Azuara et al., 2017
Mexico	bovine	SRR5657425	Sandoval-Azuara et al., 2017
Mexico	bovine	SRR5657426	Sandoval-Azuara et al., 2017
Mexico	bovine	SRR5657428	Sandoval-Azuara et al., 2017
Mexico	bovine	SRR5657430	Sandoval-Azuara et al., 2017
Mexico	bovine	SRR5657434	Sandoval-Azuara et al., 2017
Mexico	bovine	SRR5657436	Sandoval-Azuara et al., 2017
Mexico	bovine	SRR5657437	Sandoval-Azuara et al., 2017
Mexico	bovine	SRR5657440	Sandoval-Azuara et al., 2017
Mexico	bovine	SRR5657441	Sandoval-Azuara et al., 2017
Mexico	bovine	SRR5657445	Sandoval-Azuara et al., 2017
Mexico	bovine	SRR5657446	Sandoval-Azuara et al., 2017
Mexico	bovine	SRR5657447	Sandoval-Azuara et al., 2017
Mexico	bovine	SRR5657449	Sandoval-Azuara et al., 2017
Mexico	bovine	SRR5657450	Sandoval-Azuara et al., 2017
Mexico	bovine	SRR5657455	Sandoval-Azuara et al., 2017
Mexico	bovine	SRR5657457	Sandoval-Azuara et al., 2017
Mexico	bovine	SRR5657459	Sandoval-Azuara et al., 2017
Mexico	bovine	SRR5657460	Sandoval-Azuara et al., 2017
Mexico	bovine	SRR5657461	Sandoval-Azuara et al., 2017
Mexico	bovine	SRR5657463	Sandoval-Azuara et al., 2017
Mexico	bovine	SRR5657466	Sandoval-Azuara et al., 2017
Mexico	bovine	SRR5657468	Sandoval-Azuara et al., 2017
Mexico	bovine	SRR5657470	Sandoval-Azuara et al., 2017
Mexico	bovine	SRR5657471	Sandoval-Azuara et al., 2017
Mexico	bovine	SRR5657475	Sandoval-Azuara et al., 2017
Mexico	bovine	SRR5657476	Sandoval-Azuara et al., 2017
Mexico	bovine	SRR5657489	Sandoval-Azuara et al., 2017
Mexico	bovine	SRR5657490	Sandoval-Azuara et al., 2017
Mexico	bovine	SRR5657491	Sandoval-Azuara et al., 2017
Mexico	bovine	SRR5657492	Sandoval-Azuara et al., 2017
Mexico	bovine	SRR5657494	Sandoval-Azuara et al., 2017
Mexico	bovine	SRR5657496	Sandoval-Azuara et al., 2017
Mexico	bovine	SRR5657497	Sandoval-Azuara et al., 2017
Mexico	bovine	SRR5657498	Sandoval-Azuara et al., 2017
Mexico	bovine	SRR5657499	Sandoval-Azuara et al., 2017
Mexico	bovine	SRR5657506	Sandoval-Azuara et al., 2017
Mexico	bovine	SRR5657507	Sandoval-Azuara et al., 2017
Mexico	bovine	SRR5657510	Sandoval-Azuara et al., 2017
Mexico	bovine	SRR5657511	Sandoval-Azuara et al., 2017
Mexico	bovine	SRR5657512	Sandoval-Azuara et al., 2017
Mexico	bovine	SRR5657516	Sandoval-Azuara et al., 2017
Mexico	bovine	SRR5657527	Sandoval-Azuara et al., 2017
Mexico	bovine	SRR5657529	Sandoval-Azuara et al., 2017
Mexico	human	SRR5657400	Sandoval-Azuara et al., 2017
Mexico	human	SRR5657401	Sandoval-Azuara et al., 2017
Mexico	human	SRR5657408	Sandoval-Azuara et al., 2017
Mexico	human	SRR5657409	Sandoval-Azuara et al., 2017
Mexico	human	SRR5657410	Sandoval-Azuara et al., 2017
Mexico	human	SRR5657464	Sandoval-Azuara et al., 2017
Mexico	human	SRR5657465	Sandoval-Azuara et al., 2017
Mexico	human	SRR5657477	Sandoval-Azuara et al., 2017
Mexico	human	SRR5657478	Sandoval-Azuara et al., 2017
Mexico	human	SRR5657479	Sandoval-Azuara et al., 2017
Mexico	human	SRR5657480	Sandoval-Azuara et al., 2017
Mexico	human	SRR5657481	Sandoval-Azuara et al., 2017
Mexico	human	SRR5657482	Sandoval-Azuara et al., 2017
Mexico	human	SRR5657483	Sandoval-Azuara et al., 2017
Mexico	human	SRR5657484	Sandoval-Azuara et al., 2017
Mexico	human	SRR5657485	Sandoval-Azuara et al., 2017
Mexico	human	SRR5657486	Sandoval-Azuara et al., 2017
Mexico	bovine	SRR1791720	Orloski et al., 2018
Mexico	bovine	SRR1791749	Orloski et al., 2018
Mexico	bovine	SRR1791750	Orloski et al., 2018
Mexico	bovine	SRR1791765	Orloski et al., 2018
Mexico	bovine	SRR1791783	Orloski et al., 2018
Mexico	bovine	SRR1791786	Orloski et al., 2018
Mexico	bovine	SRR1791834	Trost et al., 2016
Mexico	bovine	SRR1791837	Orloski et al., 2018
Mexico	bovine	SRR1791845	Trost et al., 2016
Mexico	bovine	SRR1791853	Trost et al., 2016
Mexico	bovine	SRR1791879	Orloski et al., 2018
Mexico	bovine	SRR1791887	USDA-NVSL-DBL
Mexico	bovine	SRR1791897	Trost et al., 2016
Mexico	bovine	SRR1791898	Trost et al., 2016
Mexico	bovine	SRR1791904	Salvador et al., 2019
Mexico	bovine	SRR1791915	Orloski et al., 2018
Mexico	bovine	SRR1791966	Orloski et al., 2018
Mexico	bovine	SRR1791990	Orloski et al., 2018
Mexico	bovine	SRR1792333	Orloski et al., 2018
Mexico	bovine	SRR5657375	Sandoval-Azuara et al, 2017
Mexico	bovine	SRR5657396	Sandoval-Azuara et al, 2017
Mexico	bovine	SRR7240348	Orloski et al., 2018
Mexico	bovine	SRR7240399	Orloski et al., 2018
Mexico	bovine	SRR7240491	Orloski et al., 2018
Mexico	bovine	SRR1791729	Orloski et al., 2018
Mexico	bovine	SRR1791732	Orloski et al., 2018
Mexico	bovine	SRR1791743	Orloski et al., 2018
Mexico	bovine	SRR1791782	Orloski et al., 2018
Mexico	bovine	SRR1791799	Orloski et al., 2018
Mexico	bovine	SRR1791836	Orloski et al., 2018
Mexico	bovine	SRR1791862	Orloski et al., 2018
Mexico	bovine	SRR1791943	Orloski et al., 2018
Mexico	bovine	SRR1791991	Orloski et al., 2018
Mexico	bovine	SRR1791993	Orloski et al., 2018
Mexico	bovine	SRR1792030	Orloski et al., 2018
Mexico	bovine	SRR1792113	Orloski et al., 2018
Mexico	bovine	SRR5657442	Sandoval-Azuara et al., 2017
Mexico	bovine	SRR5657474	Orloski et al., 2018
Mexico	bovine	SRR5657488	Sandoval-Azuara et al., 2017
Mexico	bovine	SRR5657495	Sandoval-Azuara et al., 2017
NC002945	bovine	Af2122/97	Garnier et al., 2003
Northen Ireland	bovine	ERR841877	Trewby et al., 2016
Northen Ireland	badger	ERR841903	Trewby et al., 2016
Northen Ireland	bovine	ERR841791	Trewby et al., 2016
Northen Ireland	bovine	ERR841802	Trewby et al., 2016
Northen Ireland	bovine	ERR841825	Trewby et al., 2016
Northen Ireland	bovine	ERR841851	Trewby et al., 2016
Northen Ireland	bovine	ERR841854	Trewby et al., 2016
Northen Ireland	bovine	ERR841860	Trewby et al., 2016
Northen Ireland	bovine	ERR841863	Trewby et al., 2016
Northen Ireland	bovine	ERR841874	Trewby et al., 2016
Northen Ireland	bovine	ERR841889	Trewby et al., 2016
Northen Ireland	bovine	ERR841885	Trewby et al., 2016
Northen Ireland	bovine	ERR841789	Trewby et al., 2016
Northen Ireland	bovine	ERR841794	Trewby et al., 2016
Northen Ireland	bovine	ERR841796	Trewby et al., 2016
Northen Ireland	bovine	ERR841797	Trewby et al., 2016
Northen Ireland	bovine	ERR841807	Trewby et al., 2016
Northen Ireland	bovine	ERR841813	Trewby et al., 2016
Northen Ireland	bovine	ERR841816	Trewby et al., 2016
Northen Ireland	bovine	ERR841822	Trewby et al., 2016
Northen Ireland	bovine	ERR841828	Trewby et al., 2016
Northen Ireland	bovine	ERR841837	Trewby et al., 2016
Northen Ireland	bovine	ERR841839	Trewby et al., 2016
Northen Ireland	bovine	ERR841841	Trewby et al., 2016
Northen Ireland	bovine	ERR841842	Trewby et al., 2016
Northen Ireland	bovine	ERR841846	Trewby et al., 2016
Northen Ireland	bovine	ERR841862	Trewby et al., 2016
Northen Ireland	bovine	ERR841870	Trewby et al., 2016
Northen Ireland	bovine	ERR841871	Trewby et al., 2016
Northen Ireland	bovine	ERR841875	Trewby et al., 2016
Northen Ireland	bovine	ERR841879	Trewby et al., 2016
Northen Ireland	bovine	ERR841881	Trewby et al., 2016
Northen Ireland	bovine	ERR841888	Trewby et al., 2016
Northen Ireland	bovine	ERR841890	Trewby et al., 2016
Northen Ireland	bovine	ERR841898	Trewby et al., 2016
Northen Ireland	bovine	ERR841899	Trewby et al., 2016
Northen Ireland	bovine	ERR841900	Trewby et al., 2016
Northen Ireland	bovine	ERR841902	Trewby et al., 2016
Northen Ireland	badger	ERR841809	Trewby et al., 2016
Northen Ireland	badger	ERR841904	Trewby et al., 2016
Northen Ireland	badger	ERR841905	Trewby et al., 2016
Northen Ireland	bovine	ERR841787	Trewby et al., 2016
Northen Ireland	bovine	ERR841788	Trewby et al., 2016
Northen Ireland	bovine	ERR841790	Trewby et al., 2016
Northen Ireland	bovine	ERR841792	Trewby et al., 2016
Northen Ireland	bovine	ERR841793	Trewby et al., 2016
Northen Ireland	bovine	ERR841795	Trewby et al., 2016
Northen Ireland	bovine	ERR841798	Trewby et al., 2016
Northen Ireland	bovine	ERR841799	Trewby et al., 2016
Northen Ireland	bovine	ERR841800	Trewby et al., 2016
Northen Ireland	bovine	ERR841801	Trewby et al., 2016
Northen Ireland	bovine	ERR841803	Trewby et al., 2016
Northen Ireland	bovine	ERR841804	Trewby et al., 2016
Northen Ireland	bovine	ERR841805	Trewby et al., 2016
Northen Ireland	bovine	ERR841806	Trewby et al., 2016
Northen Ireland	bovine	ERR841808	Trewby et al., 2016
Northen Ireland	bovine	ERR841810	Trewby et al., 2016
Northen Ireland	bovine	ERR841811	Trewby et al., 2016
Northen Ireland	bovine	ERR841812	Trewby et al., 2016
Northen Ireland	bovine	ERR841814	Trewby et al., 2016
Northen Ireland	bovine	ERR841815	Trewby et al., 2016
Northen Ireland	bovine	ERR841817	Trewby et al., 2016
Northen Ireland	bovine	ERR841818	Trewby et al., 2016
Northen Ireland	bovine	ERR841819	Trewby et al., 2016
Northen Ireland	bovine	ERR841820	Trewby et al., 2016
Northen Ireland	bovine	ERR841821	Trewby et al., 2016
Northen Ireland	bovine	ERR841823	Trewby et al., 2016
Northen Ireland	bovine	ERR841824	Trewby et al., 2016
Northen Ireland	bovine	ERR841826	Trewby et al., 2016
Northen Ireland	bovine	ERR841827	Trewby et al., 2016
Northen Ireland	bovine	ERR841829	Trewby et al., 2016
Northen Ireland	bovine	ERR841830	Trewby et al., 2016
Northen Ireland	bovine	ERR841831	Trewby et al., 2016
Northen Ireland	bovine	ERR841832	Trewby et al., 2016
Northen Ireland	bovine	ERR841833	Trewby et al., 2016
Northen Ireland	bovine	ERR841834	Trewby et al., 2016
Northen Ireland	bovine	ERR841835	Trewby et al., 2016
Northen Ireland	bovine	ERR841836	Trewby et al., 2016
Northen Ireland	bovine	ERR841838	Trewby et al., 2016
Northen Ireland	bovine	ERR841840	Trewby et al., 2016
Northen Ireland	bovine	ERR841843	Trewby et al., 2016
Northen Ireland	bovine	ERR841844	Trewby et al., 2016
Northen Ireland	bovine	ERR841845	Trewby et al., 2016
Northen Ireland	bovine	ERR841847	Trewby et al., 2016
Northen Ireland	bovine	ERR841848	Trewby et al., 2016
Northen Ireland	bovine	ERR841849	Trewby et al., 2016
Northen Ireland	bovine	ERR841850	Trewby et al., 2016
Northen Ireland	bovine	ERR841852	Trewby et al., 2016
Northen Ireland	bovine	ERR841853	Trewby et al., 2016
Northen Ireland	bovine	ERR841855	Trewby et al., 2016
Northen Ireland	bovine	ERR841856	Trewby et al., 2016
Northen Ireland	bovine	ERR841857	Trewby et al., 2016
Northen Ireland	bovine	ERR841858	Trewby et al., 2016
Northen Ireland	bovine	ERR841859	Trewby et al., 2016
Northen Ireland	bovine	ERR841861	Trewby et al., 2016
Northen Ireland	bovine	ERR841864	Trewby et al., 2016
Northen Ireland	bovine	ERR841865	Trewby et al., 2016
Northen Ireland	bovine	ERR841867	Trewby et al., 2016
Northen Ireland	bovine	ERR841868	Trewby et al., 2016
Northen Ireland	bovine	ERR841869	Trewby et al., 2016
Northen Ireland	bovine	ERR841872	Trewby et al., 2016
Northen Ireland	bovine	ERR841878	Trewby et al., 2016
Northen Ireland	bovine	ERR841880	Trewby et al., 2016
Northen Ireland	bovine	ERR841882	Trewby et al., 2016
Northen Ireland	bovine	ERR841883	Trewby et al., 2016
Northen Ireland	bovine	ERR841884	Trewby et al., 2016
Northen Ireland	bovine	ERR841886	Trewby et al., 2016
Northen Ireland	bovine	ERR841887	Trewby et al., 2016
Northen Ireland	bovine	ERR841891	Trewby et al., 2016
Northen Ireland	bovine	ERR841892	Trewby et al., 2016
Northen Ireland	bovine	ERR841893	Trewby et al., 2016
Northen Ireland	bovine	ERR841894	Trewby et al., 2016
Northen Ireland	bovine	ERR841895	Trewby et al., 2016
Northen Ireland	bovine	ERR841896	Trewby et al., 2016
Northen Ireland	bovine	ERR841897	Trewby et al., 2016
Northen Ireland	bovine	ERR841901	Trewby et al., 2016
New Zealand	possum	ERR564260	Price-Carter et al., 2018
New Zealand	bovine	ERR564261	Price-Carter et al., 2018
New Zealand	cervid	ERR564262	Price-Carter et al., 2018
New Zealand	bovine	ERR564263	Price-Carter et al., 2018
New Zealand	bovine	ERR564264	Price-Carter et al., 2018
New Zealand	cervid	ERR564268	Price-Carter et al., 2018
New Zealand	bovine	ERR564274	Price-Carter et al., 2018
New Zealand	bovine	ERR564278	Price-Carter et al., 2018
New Zealand	bovine	ERR564282	Price-Carter et al., 2018
New Zealand	bovine	ERR564284	Price-Carter et al., 2018
New Zealand	possum	ERR564285	Price-Carter et al., 2018
New Zealand	bovine	ERR564292	Price-Carter et al., 2018
New Zealand	bovine	ERR564295	Price-Carter et al., 2018
New Zealand	possum	ERR564301	Price-Carter et al., 2018
New Zealand	bovine	ERR564304	Price-Carter et al., 2018
New Zealand	ferret	ERR564306	Price-Carter et al., 2018
New Zealand	bovine	ERR564326	Price-Carter et al., 2018
New Zealand	bovine	ERR564329	Price-Carter et al., 2018
New Zealand	bovine	ERR564334	Price-Carter et al., 2018
New Zealand	bovine	ERR564337	Price-Carter et al., 2018
New Zealand	?	ERR564338	Price-Carter et al., 2018
New Zealand	possum	ERR564342	Price-Carter et al., 2018
New Zealand	bovine	ERR564346	Price-Carter et al., 2018
New Zealand	bovine	ERR564360	Price-Carter et al., 2018
New Zealand	possum	ERR564362	Price-Carter et al., 2018
New Zealand	pig	ERR564368	Price-Carter et al., 2018
New Zealand	possum	ERR564369	Price-Carter et al., 2018
New Zealand	bovine	ERR564371	Price-Carter et al., 2018
New Zealand	ferret	ERR564373	Price-Carter et al., 2018
New Zealand	bovine	ERR564375	Price-Carter et al., 2018
New Zealand	pig	ERR564381	Price-Carter et al., 2018
New Zealand	bovine	ERR564382	Price-Carter et al., 2018
New Zealand	possum	ERR564383	Price-Carter et al., 2018
New Zealand	bovine	ERR564384	Price-Carter et al., 2018
New Zealand	pig	ERR564385	Price-Carter et al., 2018
New Zealand	bovine	ERR564387	Price-Carter et al., 2018
New Zealand	ferret	ERR564389	Price-Carter et al., 2018
New Zealand	bovine	ERR564396	Price-Carter et al., 2018
New Zealand	ferret	ERR564397	Price-Carter et al., 2018
New Zealand	ferret	ERR564410	Price-Carter et al., 2018
New Zealand	ferret	ERR564416	Price-Carter et al., 2018
New Zealand	ferret	ERR564418	Price-Carter et al., 2018
New Zealand	bovine	ERR564421	Price-Carter et al., 2018
New Zealand	ferret	ERR564423	Price-Carter et al., 2018
New Zealand	bovine	ERR564428	Price-Carter et al., 2018
New Zealand	?	ERR564431	Price-Carter et al., 2018
New Zealand	cervid	ERR564432	Price-Carter et al., 2018
New Zealand	stoat	ERR564436	Price-Carter et al., 2018
New Zealand	bovine	ERR564442	Price-Carter et al., 2018
New Zealand	?	ERR564444	Price-Carter et al., 2018
New Zealand	?	ERR564445	Price-Carter et al., 2018
New Zealand	?	ERR564446	Price-Carter et al., 2018
New Zealand	?	ERR564447	Price-Carter et al., 2018
New Zealand	pig	ERR564453	Price-Carter et al., 2018
New Zealand	ferret	ERR564455	Price-Carter et al., 2018
New Zealand	bovine	ERR564456	Price-Carter et al., 2018
New Zealand	ferret	ERR564458	Price-Carter et al., 2018
New Zealand	cervid	ERR564461	Price-Carter et al., 2018
New Zealand	possum	ERR564464	Price-Carter et al., 2018
New Zealand	bovine	ERR564466	Price-Carter et al., 2018
New Zealand	feline	ERR564469	Price-Carter et al., 2018
New Zealand	bovine	SRR5216690	Crispell et al., 2017
New Zealand	bovine	SRR5216694	Crispell et al., 2017
New Zealand	bovine	SRR5216703	Crispell et al., 2017
New Zealand	bovine	SRR5216708	Crispell et al., 2017
New Zealand	bovine	SRR5216719	Crispell et al., 2017
New Zealand	bovine	SRR5216725	Crispell et al., 2017
New Zealand	bovine	SRR5216740	Crispell et al., 2017
New Zealand	bovine	SRR5216760	Crispell et al., 2017
New Zealand	bovine	SRR5216762	Crispell et al., 2017
New Zealand	bovine	SRR5216763	Crispell et al., 2017
New Zealand	bovine	SRR5216770	Crispell et al., 2017
New Zealand	bovine	SRR5216775	Crispell et al., 2017
New Zealand	bovine	SRR5216777	Crispell et al., 2017
New Zealand	bovine	SRR5216778	Crispell et al., 2017
New Zealand	bovine	SRR5216780	Crispell et al., 2017
New Zealand	bovine	SRR5216782	Crispell et al., 2017
New Zealand	bovine	SRR5216784	Crispell et al., 2017
New Zealand	bovine	SRR5216833	Crispell et al., 2017
New Zealand	bovine	SRR5216838	Crispell et al., 2017
New Zealand	bovine	SRR5216857	Crispell et al., 2017
New Zealand	bovine	SRR5216866	Crispell et al., 2017
New Zealand	bovine	SRR5216868	Crispell et al., 2017
New Zealand	bovine	SRR5216876	Crispell et al., 2017
New Zealand	bovine	SRR5216900	Crispell et al., 2017
New Zealand	bovine	SRR5216901	Crispell et al., 2017
New Zealand	bovine	SRR5216902	Crispell et al., 2017
New Zealand	bovine	SRR5216916	Crispell et al., 2017
New Zealand	bovine	SRR5216918	Crispell et al., 2017
New Zealand	bovine	SRR5216926	Crispell et al., 2017
New Zealand	bovine	SRR5216930	Crispell et al., 2017
New Zealand	bovine	SRR5216932	Crispell et al., 2017
New Zealand	bovine	SRR5216933	Crispell et al., 2017
New Zealand	bovine	SRR5216938	Crispell et al., 2017
New Zealand	bovine	SRR5216944	Crispell et al., 2017
New Zealand	bovine	SRR5216947	Crispell et al., 2017
New Zealand	bovine	SRR5216969	Crispell et al., 2017
New Zealand	bovine	SRR5216977	Crispell et al., 2017
New Zealand	bovine	SRR5216693	Crispell et al. 2017
New Zealand	bovine	SRR5216701	Crispell et al. 2017
New Zealand	bovine	SRR5216706	Crispell et al. 2017
New Zealand	bovine	SRR5216710	Crispell et al. 2017
New Zealand	bovine	SRR5216717	Crispell et al. 2017
New Zealand	bovine	SRR5216723	Crispell et al. 2017
New Zealand	bovine	SRR5216726	Crispell et al. 2017
New Zealand	bovine	SRR5216728	Crispell et al. 2017
New Zealand	bovine	SRR5216732	Crispell et al. 2017
New Zealand	bovine	SRR5216734	Crispell et al. 2017
New Zealand	bovine	SRR5216735	Crispell et al. 2017
New Zealand	bovine	SRR5216737	Crispell et al. 2017
New Zealand	bovine	SRR5216738	Crispell et al. 2017
New Zealand	bovine	SRR5216742	Crispell et al. 2017
New Zealand	bovine	SRR5216744	Crispell et al. 2017
New Zealand	bovine	SRR5216745	Crispell et al. 2017
New Zealand	bovine	SRR5216750	Crispell et al. 2017
New Zealand	bovine	SRR5216754	Crispell et al. 2017
New Zealand	bovine	SRR5216766	Crispell et al. 2017
New Zealand	bovine	SRR5216774	Crispell et al. 2017
New Zealand	bovine	SRR5216776	Crispell et al. 2017
New Zealand	bovine	SRR5216781	Crispell et al. 2017
New Zealand	bovine	SRR5216785	Crispell et al. 2017
New Zealand	bovine	SRR5216789	Crispell et al. 2017
New Zealand	bovine	SRR5216790	Crispell et al. 2017
New Zealand	bovine	SRR5216791	Crispell et al. 2017
New Zealand	bovine	SRR5216792	Crispell et al. 2017
New Zealand	bovine	SRR5216795	Crispell et al. 2017
New Zealand	bovine	SRR5216800	Crispell et al. 2017
New Zealand	bovine	SRR5216801	Crispell et al. 2017
New Zealand	bovine	SRR5216804	Crispell et al. 2017
New Zealand	bovine	SRR5216807	Crispell et al. 2017
New Zealand	bovine	SRR5216808	Crispell et al. 2017
New Zealand	bovine	SRR5216812	Crispell et al. 2017
New Zealand	bovine	SRR5216813	Crispell et al. 2017
New Zealand	bovine	SRR5216815	Crispell et al. 2017
New Zealand	bovine	SRR5216816	Crispell et al. 2017
New Zealand	bovine	SRR5216819	Crispell et al. 2017
New Zealand	bovine	SRR5216822	Crispell et al. 2017
New Zealand	bovine	SRR5216823	Crispell et al. 2017
New Zealand	bovine	SRR5216830	Crispell et al. 2017
New Zealand	bovine	SRR5216832	Crispell et al. 2017
New Zealand	bovine	SRR5216845	Crispell et al. 2017
New Zealand	bovine	SRR5216849	Crispell et al. 2017
New Zealand	bovine	SRR5216860	Crispell et al. 2017
New Zealand	bovine	SRR5216872	Crispell et al. 2017
New Zealand	bovine	SRR5216874	Crispell et al. 2017
New Zealand	bovine	SRR5216896	Crispell et al. 2017
New Zealand	bovine	SRR5216897	Crispell et al. 2017
New Zealand	bovine	SRR5216903	Crispell et al. 2017
New Zealand	bovine	SRR5216905	Crispell et al. 2017
New Zealand	bovine	SRR5216907	Crispell et al. 2017
New Zealand	bovine	SRR5216921	Crispell et al. 2017
New Zealand	bovine	SRR5216924	Crispell et al. 2017
New Zealand	bovine	SRR5216931	Crispell et al. 2017
New Zealand	bovine	SRR5216935	Crispell et al. 2017
New Zealand	bovine	SRR5216942	Crispell et al. 2017
New Zealand	bovine	SRR5216948	Crispell et al. 2017
New Zealand	bovine	SRR5216950	Crispell et al. 2017
New Zealand	bovine	SRR5216952	Crispell et al. 2017
New Zealand	bovine	SRR5216953	Crispell et al. 2017
New Zealand	bovine	SRR5216955	Crispell et al. 2017
New Zealand	bovine	SRR5216963	Crispell et al. 2017
New Zealand	bovine	SRR5216966	Crispell et al. 2017
New Zealand	bovine	SRR5216968	Crispell et al. 2017
New Zealand	bovine	SRR5216975	Crispell et al. 2017
New Zealand	bovine	SRR5216976	Crispell et al. 2017
New Zealand	bovine	SRR5216982	Crispell et al. 2017
New Zealand	bovine	SRR5216985	Crispell et al. 2017
New Zealand	cervid	SRR5216765	Crispell et al. 2017
New Zealand	ferret	SRR5216700	Crispell et al. 2017
New Zealand	ferret	SRR5216747	Crispell et al. 2017
New Zealand	ferret	SRR5216752	Crispell et al. 2017
New Zealand	ferret	SRR5216796	Crispell et al. 2017
New Zealand	ferret	SRR5216802	Crispell et al. 2017
New Zealand	ferret	SRR5216806	Crispell et al. 2017
New Zealand	ferret	SRR5216811	Crispell et al. 2017
New Zealand	ferret	SRR5216817	Crispell et al. 2017
New Zealand	ferret	SRR5216827	Crispell et al. 2017
New Zealand	ferret	SRR5216842	Crispell et al. 2017
New Zealand	ferret	SRR5216867	Crispell et al. 2017
New Zealand	ferret	SRR5216906	Crispell et al. 2017
New Zealand	ferret	SRR5216920	Crispell et al. 2017
New Zealand	ferret	SRR5216958	Crispell et al. 2017
New Zealand	porcine	SRR5216749	Crispell et al. 2017
New Zealand	porcine	SRR5216797	Crispell et al. 2017
New Zealand	possum	SRR5216711	Crispell et al. 2017
New Zealand	possum	SRR5216720	Crispell et al. 2017
New Zealand	possum	SRR5216729	Crispell et al. 2017
New Zealand	possum	SRR5216730	Crispell et al. 2017
New Zealand	possum	SRR5216733	Crispell et al. 2017
New Zealand	possum	SRR5216753	Crispell et al. 2017
New Zealand	possum	SRR5216757	Crispell et al. 2017
New Zealand	possum	SRR5216758	Crispell et al. 2017
New Zealand	possum	SRR5216779	Crispell et al. 2017
New Zealand	possum	SRR5216803	Crispell et al. 2017
New Zealand	possum	SRR5216809	Crispell et al. 2017
New Zealand	possum	SRR5216810	Crispell et al. 2017
New Zealand	possum	SRR5216843	Crispell et al. 2017
New Zealand	possum	SRR5216858	Crispell et al. 2017
New Zealand	possum	SRR5216873	Crispell et al. 2017
New Zealand	possum	SRR5216879	Crispell et al. 2017
New Zealand	possum	SRR5216888	Crispell et al. 2017
New Zealand	possum	SRR5216898	Crispell et al. 2017
New Zealand	possum	SRR5216912	Crispell et al. 2017
New Zealand	possum	SRR5216919	Crispell et al. 2017
New Zealand	possum	SRR5216922	Crispell et al. 2017
New Zealand	possum	SRR5216945	Crispell et al. 2017
New Zealand	possum	SRR5216951	Crispell et al. 2017
New Zealand	possum	SRR5216960	Crispell et al. 2017
New Zealand	possum	SRR5216964	Crispell et al. 2017
New Zealand	possum	SRR5216972	Crispell et al. 2017
New Zealand	possum	SRR5216973	Crispell et al. 2017
New Zealand	possum	SRR5216974	Crispell et al. 2017
New Zealand	possum	SRR5216984	Crispell et al. 2017
New Zealand	?	ERR564265	Price-Carter et al., 2018
New Zealand	bovine	ERR564266	Price-Carter et al., 2018
New Zealand	bovine	ERR564267	Price-Carter et al., 2018
New Zealand	bovine	ERR564269	Price-Carter et al., 2018
New Zealand	bovine	ERR564270	Price-Carter et al., 2018
New Zealand	possum	ERR564271	Price-Carter et al., 2018
New Zealand	bovine	ERR564272	Price-Carter et al., 2018
New Zealand	bovine	ERR564273	Price-Carter et al., 2018
New Zealand	bovine	ERR564275	Price-Carter et al., 2018
New Zealand	bovine	ERR564276	Price-Carter et al., 2018
New Zealand	Ferret	ERR564277	Price-Carter et al., 2018
New Zealand	pig	ERR564279	Price-Carter et al., 2018
New Zealand	bovine	ERR564280	Price-Carter et al., 2018
New Zealand	bovine	ERR564281	Price-Carter et al., 2018
New Zealand	bovine	ERR564283	Price-Carter et al., 2018
New Zealand	bovine	ERR564286	Price-Carter et al., 2018
New Zealand	bovine	ERR564287	Price-Carter et al., 2018
New Zealand	bovine	ERR564288	Price-Carter et al., 2018
New Zealand	bovine	ERR564289	Price-Carter et al., 2018
New Zealand	bovine	ERR564290	Price-Carter et al., 2018
New Zealand	cervid	ERR564291	Price-Carter et al., 2018
New Zealand	ferret	ERR564293	Price-Carter et al., 2018
New Zealand	ferret	ERR564294	Price-Carter et al., 2018
New Zealand	bovine	ERR564296	Price-Carter et al., 2018
New Zealand	bovine	ERR564297	Price-Carter et al., 2018
New Zealand	bovine	ERR564298	Price-Carter et al., 2018
New Zealand	bovine	ERR564299	Price-Carter et al., 2018
New Zealand	bovine	ERR564300	Price-Carter et al., 2018
New Zealand	bovine	ERR564302	Price-Carter et al., 2018
New Zealand	bovine	ERR564303	Price-Carter et al., 2018
New Zealand	bovine	ERR564305	Price-Carter et al., 2018
New Zealand	possum	ERR564307	Price-Carter et al., 2018
New Zealand	possum	ERR564308	Price-Carter et al., 2018
New Zealand	ferret	ERR564309	Price-Carter et al., 2018
New Zealand	ferret	ERR564310	Price-Carter et al., 2018
New Zealand	ferret	ERR564311	Price-Carter et al., 2018
New Zealand	bovine	ERR564312	Price-Carter et al., 2018
New Zealand	bovine	ERR564313	Price-Carter et al., 2018
New Zealand	cervid	ERR564314	Price-Carter et al., 2018
New Zealand	ferret	ERR564315	Price-Carter et al., 2018
New Zealand	bovine	ERR564316	Price-Carter et al., 2018
New Zealand	bovine	ERR564317	Price-Carter et al., 2018
New Zealand	cervid	ERR564318	Price-Carter et al., 2018
New Zealand	bovine	ERR564319	Price-Carter et al., 2018
New Zealand	bovine	ERR564320	Price-Carter et al., 2018
New Zealand	bovine	ERR564321	Price-Carter et al., 2018
New Zealand	bovine	ERR564322	Price-Carter et al., 2018
New Zealand	bovine	ERR564323	Price-Carter et al., 2018
New Zealand	ferret	ERR564324	Price-Carter et al., 2018
New Zealand	possum	ERR564325	Price-Carter et al., 2018
New Zealand	?	ERR564327	Price-Carter et al., 2018
New Zealand	bovine	ERR564328	Price-Carter et al., 2018
New Zealand	bovine	ERR564330	Price-Carter et al., 2018
New Zealand	possum	ERR564331	Price-Carter et al., 2018
New Zealand	ferret	ERR564332	Price-Carter et al., 2018
New Zealand	ferret	ERR564333	Price-Carter et al., 2018
New Zealand	bovine	ERR564335	Price-Carter et al., 2018
New Zealand	bovine	ERR564336	Price-Carter et al., 2018
New Zealand	bovine	ERR564339	Price-Carter et al., 2018
New Zealand	bovine	ERR564340	Price-Carter et al., 2018
New Zealand	bovine	ERR564341	Price-Carter et al., 2018
New Zealand	bovine	ERR564343	Price-Carter et al., 2018
New Zealand	bovine	ERR564344	Price-Carter et al., 2018
New Zealand	bovine	ERR564345	Price-Carter et al., 2018
New Zealand	ferret	ERR564347	Price-Carter et al., 2018
New Zealand	bovine	ERR564348	Price-Carter et al., 2018
New Zealand	ferret	ERR564349	Price-Carter et al., 2018
New Zealand	bovine	ERR564350	Price-Carter et al., 2018
New Zealand	bovine	ERR564351	Price-Carter et al., 2018
New Zealand	bovine	ERR564352	Price-Carter et al., 2018
New Zealand	cervid	ERR564353	Price-Carter et al., 2018
New Zealand	possum	ERR564354	Price-Carter et al., 2018
New Zealand	?	ERR564355	Price-Carter et al., 2018
New Zealand	?	ERR564356	Price-Carter et al., 2018
New Zealand	?	ERR564357	Price-Carter et al., 2018
New Zealand	possum	ERR564358	Price-Carter et al., 2018
New Zealand	bovine	ERR564359	Price-Carter et al., 2018
New Zealand	cervid	ERR564361	Price-Carter et al., 2018
New Zealand	ferret	ERR564364	Price-Carter et al., 2018
New Zealand	possum	ERR564365	Price-Carter et al., 2018
New Zealand	bovine	ERR564366	Price-Carter et al., 2018
New Zealand	possum	ERR564367	Price-Carter et al., 2018
New Zealand	bovine	ERR564370	Price-Carter et al., 2018
New Zealand	ferret	ERR564374	Price-Carter et al., 2018
New Zealand	possum	ERR564376	Price-Carter et al., 2018
New Zealand	feline	ERR564377	Price-Carter et al., 2018
New Zealand	pig	ERR564378	Price-Carter et al., 2018
New Zealand	possum	ERR564379	Price-Carter et al., 2018
New Zealand	pig	ERR564380	Price-Carter et al., 2018
New Zealand	bovine	ERR564386	Price-Carter et al., 2018
New Zealand	bovine	ERR564388	Price-Carter et al., 2018
New Zealand	ferret	ERR564390	Price-Carter et al., 2018
New Zealand	possum	ERR564391	Price-Carter et al., 2018
New Zealand	bovine	ERR564392	Price-Carter et al., 2018
New Zealand	ferret	ERR564393	Price-Carter et al., 2018
New Zealand	bovine	ERR564394	Price-Carter et al., 2018
New Zealand	bovine	ERR564395	Price-Carter et al., 2018
New Zealand	pig	ERR564398	Price-Carter et al., 2018
New Zealand	bovine	ERR564399	Price-Carter et al., 2018
New Zealand	ferret	ERR564400	Price-Carter et al., 2018
New Zealand	ferret	ERR564401	Price-Carter et al., 2018
New Zealand	bovine	ERR564402	Price-Carter et al., 2018
New Zealand	bovine	ERR564403	Price-Carter et al., 2018
New Zealand	bovine	ERR564404	Price-Carter et al., 2018
New Zealand	bovine	ERR564405	Price-Carter et al., 2018
New Zealand	bovine	ERR564406	Price-Carter et al., 2018
New Zealand	bovine	ERR564407	Price-Carter et al., 2018
New Zealand	possum	ERR564408	Price-Carter et al., 2018
New Zealand	bovine	ERR564409	Price-Carter et al., 2018
New Zealand	bovine	ERR564411	Price-Carter et al., 2018
New Zealand	bovine	ERR564412	Price-Carter et al., 2018
New Zealand	bovine	ERR564413	Price-Carter et al., 2018
New Zealand	bovine	ERR564414	Price-Carter et al., 2018
New Zealand	ferret	ERR564415	Price-Carter et al., 2018
New Zealand	bovine	ERR564417	Price-Carter et al., 2018
New Zealand	ferret	ERR564419	Price-Carter et al., 2018
New Zealand	bovine	ERR564420	Price-Carter et al., 2018
New Zealand	bovine	ERR564422	Price-Carter et al., 2018
New Zealand	ferret	ERR564424	Price-Carter et al., 2018
New Zealand	ferret	ERR564425	Price-Carter et al., 2018
New Zealand	?	ERR564426	Price-Carter et al., 2018
New Zealand	bovine	ERR564427	Price-Carter et al., 2018
New Zealand	cervid	ERR564429	Price-Carter et al., 2018
New Zealand	bovine	ERR564430	Price-Carter et al., 2018
New Zealand	ferret	ERR564433	Price-Carter et al., 2018
New Zealand	bovine	ERR564434	Price-Carter et al., 2018
New Zealand	bovine	ERR564435	Price-Carter et al., 2018
New Zealand	possum	ERR564437	Price-Carter et al., 2018
New Zealand	bovine	ERR564438	Price-Carter et al., 2018
New Zealand	cervid	ERR564439	Price-Carter et al., 2018
New Zealand	possum	ERR564440	Price-Carter et al., 2018
New Zealand	bovine	ERR564441	Price-Carter et al., 2018
New Zealand	bovine	ERR564443	Price-Carter et al., 2018
New Zealand	?	ERR564448	Price-Carter et al., 2018
New Zealand	?	ERR564449	Price-Carter et al., 2018
New Zealand	?	ERR564450	Price-Carter et al., 2018
New Zealand	?	ERR564451	Price-Carter et al., 2018
New Zealand	?	ERR564452	Price-Carter et al., 2018
New Zealand	bovine	ERR564454	Price-Carter et al., 2018
New Zealand	bovine	ERR564457	Price-Carter et al., 2018
New Zealand	bovine	ERR564459	Price-Carter et al., 2018
New Zealand	bovine	ERR564460	Price-Carter et al., 2018
New Zealand	bovine	ERR564462	Price-Carter et al., 2018
New Zealand	bovine	ERR564463	Price-Carter et al., 2018
New Zealand	bovine	ERR564465	Price-Carter et al., 2018
New Zealand	bovine	ERR564467	Price-Carter et al., 2018
New Zealand	pig	ERR564468	Price-Carter et al., 2018
New Zealand	?	ERR564470	Price-Carter et al., 2018
New Zealand	?	ERR564471	Price-Carter et al., 2018
New Zealand	?	ERR564472	Price-Carter et al., 2018
New Zealand	?	ERR564473	Price-Carter et al., 2018
New Zealand	?	ERR564474	Price-Carter et al., 2018
New Zealand	?	ERR564475	Price-Carter et al., 2018
New Zealand	?	ERR564476	Price-Carter et al., 2018
New Zealand	?	ERR564477	Price-Carter et al., 2018
New Zealand	bovine	SRR5216707	Crispell et al., 2017
New Zealand	bovine	SRR5216736	Crispell et al., 2017
New Zealand	bovine	SRR5216741	Crispell et al., 2017
New Zealand	bovine	SRR5216764	Crispell et al., 2017
New Zealand	bovine	SRR5216768	Crispell et al., 2017
New Zealand	bovine	SRR5216769	Crispell et al., 2017
New Zealand	bovine	SRR5216798	Crispell et al., 2017
New Zealand	bovine	SRR5216799	Crispell et al., 2017
New Zealand	bovine	SRR5216805	Crispell et al., 2017
New Zealand	bovine	SRR5216821	Crispell et al., 2017
New Zealand	bovine	SRR5216828	Crispell et al., 2017
New Zealand	bovine	SRR5216840	Crispell et al., 2017
New Zealand	bovine	SRR5216847	Crispell et al., 2017
New Zealand	bovine	SRR5216850	Crispell et al., 2017
New Zealand	bovine	SRR5216851	Crispell et al., 2017
New Zealand	bovine	SRR5216853	Crispell et al., 2017
New Zealand	bovine	SRR5216864	Crispell et al., 2017
New Zealand	bovine	SRR5216880	Crispell et al., 2017
New Zealand	bovine	SRR5216884	Crispell et al., 2017
New Zealand	bovine	SRR5216913	Crispell et al., 2017
New Zealand	bovine	SRR5216914	Crispell et al., 2017
New Zealand	bovine	SRR5216915	Crispell et al., 2017
New Zealand	bovine	SRR5216923	Crispell et al., 2017
New Zealand	bovine	SRR5216934	Crispell et al., 2017
New Zealand	bovine	SRR5216961	Crispell et al., 2017
New Zealand	bovine	SRR5216691	Crispell et al. 2017
New Zealand	bovine	SRR5216692	Crispell et al. 2017
New Zealand	bovine	SRR5216695	Crispell et al. 2017
New Zealand	bovine	SRR5216702	Crispell et al. 2017
New Zealand	bovine	SRR5216704	Crispell et al. 2017
New Zealand	bovine	SRR5216712	Crispell et al. 2017
New Zealand	bovine	SRR5216714	Crispell et al. 2017
New Zealand	bovine	SRR5216718	Crispell et al. 2017
New Zealand	bovine	SRR5216722	Crispell et al. 2017
New Zealand	bovine	SRR5216743	Crispell et al. 2017
New Zealand	bovine	SRR5216748	Crispell et al. 2017
New Zealand	bovine	SRR5216751	Crispell et al. 2017
New Zealand	bovine	SRR5216755	Crispell et al. 2017
New Zealand	bovine	SRR5216756	Crispell et al. 2017
New Zealand	bovine	SRR5216759	Crispell et al. 2017
New Zealand	bovine	SRR5216772	Crispell et al. 2017
New Zealand	bovine	SRR5216773	Crispell et al. 2017
New Zealand	bovine	SRR5216786	Crispell et al. 2017
New Zealand	bovine	SRR5216787	Crispell et al. 2017
New Zealand	bovine	SRR5216788	Crispell et al. 2017
New Zealand	bovine	SRR5216818	Crispell et al. 2017
New Zealand	bovine	SRR5216825	Crispell et al. 2017
New Zealand	bovine	SRR5216826	Crispell et al. 2017
New Zealand	bovine	SRR5216829	Crispell et al. 2017
New Zealand	bovine	SRR5216834	Crispell et al. 2017
New Zealand	bovine	SRR5216835	Crispell et al. 2017
New Zealand	bovine	SRR5216839	Crispell et al. 2017
New Zealand	bovine	SRR5216844	Crispell et al. 2017
New Zealand	bovine	SRR5216846	Crispell et al. 2017
New Zealand	bovine	SRR5216854	Crispell et al. 2017
New Zealand	bovine	SRR5216855	Crispell et al. 2017
New Zealand	bovine	SRR5216856	Crispell et al. 2017
New Zealand	bovine	SRR5216859	Crispell et al. 2017
New Zealand	bovine	SRR5216862	Crispell et al. 2017
New Zealand	bovine	SRR5216863	Crispell et al. 2017
New Zealand	bovine	SRR5216865	Crispell et al. 2017
New Zealand	bovine	SRR5216869	Crispell et al. 2017
New Zealand	bovine	SRR5216870	Crispell et al. 2017
New Zealand	bovine	SRR5216881	Crispell et al. 2017
New Zealand	bovine	SRR5216883	Crispell et al. 2017
New Zealand	bovine	SRR5216885	Crispell et al. 2017
New Zealand	bovine	SRR5216887	Crispell et al. 2017
New Zealand	bovine	SRR5216889	Crispell et al. 2017
New Zealand	bovine	SRR5216893	Crispell et al. 2017
New Zealand	bovine	SRR5216894	Crispell et al. 2017
New Zealand	bovine	SRR5216911	Crispell et al. 2017
New Zealand	bovine	SRR5216925	Crispell et al. 2017
New Zealand	bovine	SRR5216928	Crispell et al. 2017
New Zealand	bovine	SRR5216929	Crispell et al. 2017
New Zealand	bovine	SRR5216936	Crispell et al. 2017
New Zealand	bovine	SRR5216937	Crispell et al. 2017
New Zealand	bovine	SRR5216939	Crispell et al. 2017
New Zealand	bovine	SRR5216940	Crispell et al. 2017
New Zealand	bovine	SRR5216941	Crispell et al. 2017
New Zealand	bovine	SRR5216943	Crispell et al. 2017
New Zealand	bovine	SRR5216949	Crispell et al. 2017
New Zealand	bovine	SRR5216956	Crispell et al. 2017
New Zealand	bovine	SRR5216962	Crispell et al. 2017
New Zealand	bovine	SRR5216967	Crispell et al. 2017
New Zealand	bovine	SRR5216970	Crispell et al. 2017
New Zealand	cervid	SRR5216882	Crispell et al. 2017
New Zealand	cervid	SRR5216965	Crispell et al. 2017
New Zealand	cervid	SRR5216983	Crispell et al. 2017
New Zealand	ferret	SRR5216705	Crispell et al. 2017
New Zealand	ferret	SRR5216715	Crispell et al. 2017
New Zealand	ferret	SRR5216716	Crispell et al. 2017
New Zealand	ferret	SRR5216721	Crispell et al. 2017
New Zealand	ferret	SRR5216724	Crispell et al. 2017
New Zealand	ferret	SRR5216731	Crispell et al. 2017
New Zealand	ferret	SRR5216739	Crispell et al. 2017
New Zealand	ferret	SRR5216761	Crispell et al. 2017
New Zealand	ferret	SRR5216771	Crispell et al. 2017
New Zealand	ferret	SRR5216783	Crispell et al. 2017
New Zealand	ferret	SRR5216793	Crispell et al. 2017
New Zealand	ferret	SRR5216814	Crispell et al. 2017
New Zealand	ferret	SRR5216824	Crispell et al. 2017
New Zealand	ferret	SRR5216861	Crispell et al. 2017
New Zealand	ferret	SRR5216878	Crispell et al. 2017
New Zealand	ferret	SRR5216899	Crispell et al. 2017
New Zealand	ferret	SRR5216904	Crispell et al. 2017
New Zealand	ferret	SRR5216908	Crispell et al. 2017
New Zealand	ferret	SRR5216909	Crispell et al. 2017
New Zealand	ferret	SRR5216954	Crispell et al. 2017
New Zealand	ferret	SRR5216957	Crispell et al. 2017
New Zealand	ferret	SRR5216959	Crispell et al. 2017
New Zealand	ferret	SRR5216971	Crispell et al. 2017
New Zealand	ferret	SRR5216978	Crispell et al. 2017
New Zealand	porcine	SRR5216767	Crispell et al. 2017
New Zealand	porcine	SRR5216836	Crispell et al. 2017
New Zealand	porcine	SRR5216875	Crispell et al. 2017
New Zealand	porcine	SRR5216886	Crispell et al. 2017
New Zealand	porcine	SRR5216946	Crispell et al. 2017
New Zealand	possum	SRR5216696	Crispell et al. 2017
New Zealand	possum	SRR5216697	Crispell et al. 2017
New Zealand	possum	SRR5216698	Crispell et al. 2017
New Zealand	possum	SRR5216699	Crispell et al. 2017
New Zealand	possum	SRR5216709	Crispell et al. 2017
New Zealand	possum	SRR5216713	Crispell et al. 2017
New Zealand	possum	SRR5216727	Crispell et al. 2017
New Zealand	possum	SRR5216746	Crispell et al. 2017
New Zealand	possum	SRR5216794	Crispell et al. 2017
New Zealand	possum	SRR5216837	Crispell et al. 2017
New Zealand	possum	SRR5216848	Crispell et al. 2017
New Zealand	possum	SRR5216852	Crispell et al. 2017
New Zealand	possum	SRR5216871	Crispell et al. 2017
New Zealand	possum	SRR5216877	Crispell et al. 2017
New Zealand	possum	SRR5216890	Crispell et al. 2017
New Zealand	possum	SRR5216891	Crispell et al. 2017
New Zealand	possum	SRR5216892	Crispell et al. 2017
New Zealand	possum	SRR5216895	Crispell et al. 2017
New Zealand	possum	SRR5216910	Crispell et al. 2017
New Zealand	possum	SRR5216917	Crispell et al. 2017
New Zealand	possum	SRR5216927	Crispell et al. 2017
New Zealand	possum	SRR5216979	Crispell et al. 2017
New Zealand	possum	SRR5216980	Crispell et al. 2017
New Zealand	possum	SRR5216981	Crispell et al. 2017
New Zealand	stoat	SRR5216820	Crispell et al. 2017
Panama	bovine	SRR1657068	Acosta et al., 2015
Panama	bovine	SRR1657061	Acosta et al., 2015
Panama	bovine	SRR1657070	Acosta et al., 2015
Russia	human	ERR229952	Casali et al. 2014
South Africa	bovine	ERR1815544	Dippenaar et al., 2017
South Africa	buffalo	ERR1815539	Dippenaar et al., 2017
South Africa	buffalo	ERR1815541	Dippenaar et al., 2017
South Africa	buffalo	ERR1815542	Dippenaar et al., 2017
South Africa	buffalo	ERR1815543	Dippenaar et al., 2017
South Africa	buffalo	ERR1815545	Dippenaar et al., 2017
South Africa	buffalo	ERR1815546	Dippenaar et al., 2017
South Africa	buffalo	ERR1815547	Dippenaar et al., 2017
South Africa	kudu	ERR1815540	Dippenaar et al., 2017
South Africa	lion	ERR1815549	Dippenaar et al., 2017
South Africa	lion	ERR1815550	Dippenaar et al., 2017
Spain	bovine	SRR5486087	Ghebremariam et al., 2018
Spain	bovine	SRR5486088	Ghebremariam et al., 2018
Spain	bovine	SRR5486089	Ghebremariam et al., 2018
Spain	bovine	SRR5486090	Ghebremariam et al., 2018
Spain	bovine	SRR5486091	Ghebremariam et al., 2018
Spain	bovine	SRR5486092	Ghebremariam et al., 2018
Spain	bovine	SRR5486093	Ghebremariam et al., 2018
Switzerland	?	ERR2659161	Brites et al., 2018
Switzerland	?	ERR2659162	Brites et al., 2018
Switzerland	?	ERR2659159	Brites et al., 2018
Switzerland	?	ERR2659160	Brites et al., 2018
Tanzania	chimpanzee	SRR1791710	Orloski et al., 2018
Tanzania	chimpanzee	SRR1791712	Orloski et al., 2018
Tunisia	human	SRR3085259	Schena et al., 2016
Uganda	chimpanzee	SRR1173570	Wanzala et al., 2015
United Kingdom	human	ERR400386	Walker et al. 2015
United Kingdom	human	ERR400460	Walker et al. 2015
United Kingdom	human	SRR6044919	Quann et al., 2018
United Kingdom	human	SRR6045019	Quann et al., 2018
United Kingdom	human	SRR6045806	Quann et al., 2018
United Kingdom	human	SRR6045827	Quann et al., 2018
United Kingdom	human	SRR6046252	Quann et al., 2018
United Kingdom	human	SRR6046738	Quann et al., 2018
United Kingdom	human	SRR6045214	Quann et al., 2018
United Kingdom	human	SRR6045235	Quann et al., 2018
United Kingdom	human	SRR6045407	Quann et al., 2018
Uruguay	bovine	SRR5430098	Lasserre et al., 2018
Uruguay	bovine	SRR5430569	Lasserre et al., 2018
Uruguay	bovine	SRR5430746	Lasserre et al., 2018
Uruguay	bovine	SRR5430750	Lasserre et al., 2018
Uruguay	bovine	SRR5430747	Lasserre et al., 2018
USA	bovine	SRR1791697	Orloski et al., 2018
USA	bovine	SRR1791698	USDA-NVSL-DBL
USA	bovine	SRR1791699	USDA-NVSL-DBL
USA	bovine	SRR1791718	USDA-NVSL-DBL
USA	bovine	SRR1791719	USDA-NVSL-DBL
USA	bovine	SRR1791723	Orloski et al., 2018
USA	bovine	SRR1791731	USDA-NVSL-DBL
USA	bovine	SRR1791736	Orloski et al., 2018
USA	bovine	SRR1791757	Trost et al., 2016
USA	bovine	SRR1791772	Trost et al., 2016
USA	bovine	SRR1791775	Trost et al., 2016
USA	bovine	SRR1791784	Orloski et al., 2018
USA	bovine	SRR1791793	Trost et al., 2016
USA	bovine	SRR1791825	Trost et al., 2016
USA	bovine	SRR1791830	Trost et al., 2016
USA	cervid	SRR1791832	Pattané et al., 2017
USA	bovine	SRR1791854	Trost et al., 2016
USA	bovine	SRR1791859	Orloski et al., 2018
USA	bovine	SRR1791863	Salvador et al., 2019
USA	bovine	SRR1791870	Orloski et al., 2018
USA	bovine	SRR1791881	Orloski et al., 2018
USA	bovine	SRR1791885	Orloski et al., 2018
USA	bovine	SRR1791888	Orloski et al., 2018
USA	bovine	SRR1791894	Trost et al., 2016
USA	bovine	SRR1791901	Trost et al., 2016
USA	bovine	SRR1791902	Salvador et al., 2019
USA	bovine	SRR1791911	Orloski et al., 2018
USA	bovine	SRR1791929	Trost et al., 2016
USA	bovine	SRR1791931	Trost et al., 2016
USA	cervid	SRR1791950	Orloski et al., 2018
USA	bovine	SRR1791957	Orloski et al., 2018
USA	bovine	SRR1791986	Trost et al., 2016
USA	bovine	SRR1792018	Trost et al., 2016
USA	bovine	SRR1792034	Orloski et al., 2018
USA	cervid	SRR1792037	USDA-NVSL-DBL
USA	bovine	SRR1792045	Trost et al., 2016
USA	bovine	SRR1792060	Trost et al., 2016
USA	bovine	SRR1792068	Trost et al., 2016
USA	cervid	SRR1792070	Orloski et al., 2018
USA	bovine	SRR1792079	Trost et al., 2016
USA	bovine	SRR1792087	Trost et al., 2016
USA	bovine	SRR1792090	Salvador et al., 2019
USA	bovine	SRR1792098	Pattané et al., 2017
USA	bovine	SRR1792101	Trost et al., 2016
USA	bovine	SRR1792109	Orloski et al., 2018
USA	bovine	SRR1792111	Orloski et al., 2018
USA	cervid	SRR1792123	Orloski et al., 2018
USA	bovine	SRR1792169	Orloski et al., 2018
USA	bovine	SRR1792177	Glaser et al., 2016
USA	bovine	SRR1792179	Orloski et al., 2018
USA	bovine	SRR1792181	Orloski et al., 2018
USA	cervid	SRR1792185	USDA-NVSL-DBL
USA	cervid	SRR1792186	USDA-NVSL-DBL
USA	bovine	SRR1792193	Orloski et al., 2018
USA	bovine	SRR1792194	Orloski et al., 2018
USA	bovine	SRR1792196	Orloski et al., 2018
USA	bovine	SRR1792198	Orloski et al., 2018
USA	cervid	SRR1792209	Orloski et al., 2018
USA	cervid	SRR1792211	Orloski et al., 2018
USA	cervid	SRR1792214	Orloski et al., 2018
USA	cervid	SRR1792216	Orloski et al., 2018
USA	cervid	SRR1792217	Orloski et al., 2018
USA	cervid	SRR1792218	Orloski et al., 2018
USA	cervid	SRR1792219	Orloski et al., 2018
USA	cervid	SRR1792221	Orloski et al., 2018
USA	cervid	SRR1792223	Orloski et al., 2018
USA	cervid	SRR1792224	Orloski et al., 2018
USA	cervid	SRR1792225	Orloski et al., 2018
USA	cervid	SRR1792227	Orloski et al., 2018
USA	cervid	SRR1792235	Orloski et al., 2018
USA	cervid	SRR1792237	Orloski et al., 2018
USA	bovine	SRR1792240	Trost et al., 2016
USA	bovine	SRR1792243	USDA-NVSL-DBL
USA	bovine	SRR1792246	Trost et al., 2016
USA	bovine	SRR1792252	Trost et al., 2016
USA	bovine	SRR1792253	USDA-NVSL-DBL
USA	bovine	SRR1792254	Trost et al., 2016
USA	bovine	SRR1792255	Trost et al., 2016
USA	bovine	SRR1792261	Trost et al., 2016
USA	bovine	SRR1792264	Orloski et al., 2018
USA	bovine	SRR1792266	Trost et al., 2016
USA	bovine	SRR1792268	Trost et al., 2016
USA	bovine	SRR1792270	Trost et al., 2016
USA	bovine	SRR1792271	Trost et al., 2016
USA	bovine	SRR1792274	Trost et al., 2016
USA	bovine	SRR1792275	Trost et al., 2016
USA	bovine	SRR1792278	Salvador et al., 2019
USA	bovine	SRR1792285	Trost et al., 2016
USA	bovine	SRR1792288	USDA-NVSL-DBL
USA	bovine	SRR1792289	USDA-NVSL-DBL
USA	bovine	SRR1792293	USDA-NVSL-DBL
USA	bovine	SRR1792295	Orloski et al., 2018
USA	bovine	SRR1792305	Orloski et al., 2018
USA	bovine	SRR1792306	USDA-NVSL-DBL
USA	bovine	SRR1792318	Orloski et al., 2018
USA	bovine	SRR1792325	Trost et al., 2016
USA	bovine	SRR1792331	Trost et al., 2016
USA	bovine	SRR1792332	Orloski et al., 2018
USA	bovine	SRR1792336	Orloski et al., 2018
USA	bovine	SRR1792339	Orloski et al., 2018
USA	bovine	SRR1792340	Orloski et al., 2018
USA	bovine	SRR1792342	Orloski et al., 2018
USA	bovine	SRR1792344	Trost et al., 2016
USA	bovine	SRR1792351	Trost et al., 2016
USA	bovine	SRR1792352	Trost et al., 2016
USA	bovine	SRR1792355	Trost et al., 2016
USA	bovine	SRR1792371	Orloski et al., 2018
USA	bovine	SRR1792380	USDA-NVSL-DBL
USA	bovine	SRR1792381	Trost et al., 2016
USA	bovine	SRR1792388	USDA-NVSL-DBL
USA	bovine	SRR1792389	USDA-NVSL-DBL
USA	bovine	SRR1792390	Trost et al., 2016
USA	bovine	SRR1792391	USDA-NVSL-DBL
USA	bovine	SRR1792395	Trost et al., 2016
USA	bovine	SRR1792396	Trost et al., 2016
USA	bovine	SRR1792399	USDA-NVSL-DBL
USA	bovine	SRR1792403	Trost et al., 2016
USA	bovine	SRR1792406	USDA-NVSL-DBL
USA	bovine	SRR1792407	USDA-NVSL-DBL
USA	bovine	SRR1792412	USDA-NVSL-DBL
USA	bovine	SRR1792413	Orloski et al., 2018
USA	bovine	SRR1792416	Orloski et al., 2018
USA	cervid	SRR1792423	USDA-NVSL-DBL
USA	bovine	SRR1792439	USDA-NVSL-DBL
USA	bovine	SRR1792440	USDA-NVSL-DBL
USA	bovine	SRR1792442	USDA-NVSL-DBL
USA	bovine	SRR1792444	Orloski et al., 2018
USA	bovine	SRR1792450	USDA-NVSL-DBL
USA	bovine	SRR1792468	USDA-NVSL-DBL
USA	cervid	SRR1792475	Orloski et al., 2018
USA	cervid	SRR1792476	Orloski et al., 2018
USA	bovine	SRR1792477	Orloski et al., 2018
USA	cervid	SRR1792481	Orloski et al., 2018
USA	cervid	SRR1792482	Orloski et al., 2018
USA	cervid	SRR1792488	Orloski et al., 2018
USA	cervid	SRR1792489	Orloski et al., 2018
USA	bovine	SRR1792490	Orloski et al., 2018
USA	bovine	SRR1792494	Orloski et al., 2018
USA	cervid	SRR1792497	Pattané et al., 2017
USA	cervid	SRR1792500	Orloski et al., 2018
USA	bovine	SRR1792501	Salvador et al., 2019
USA	bovine	SRR1792503	USDA-NVSL-DBL
USA	bovine	SRR1792507	USDA-NVSL-DBL
USA	bovine	SRR1792509	USDA-NVSL-DBL
USA	bovine	SRR3091246	USDA-NVSL-DBL
USA	bovine	SRR3091249	USDA-NVSL-DBL
USA	bovine	SRR3091254	USDA-NVSL-DBL
USA	deer	SRR3091257	USDA-NVSL-DBL
USA	deer	SRR3091258	USDA-NVSL-DBL
USA	elephant	SRR3135067	Orloski et al., 2018
USA	non-human primate	SRR3135070	Orloski et al., 2018
USA	deer	SRR5817676	Bruning-Fann et al., 2017
USA	deer	SRR5817677	Bruning-Fann et al., 2017
USA	deer	SRR5817678	Bruning-Fann et al., 2017
USA	deer	SRR5817679	Bruning-Fann et al., 2017
USA	deer	SRR5817688	Bruning-Fann et al., 2017
USA	deer	SRR5817692	Bruning-Fann et al., 2017
USA	deer	SRR5817693	Bruning-Fann et al., 2017
USA	deer	SRR5817694	Bruning-Fann et al., 2017
USA	deer	SRR5817698	Bruning-Fann et al., 2017
USA	bovine	SRR5817699	Trost et al., 2016
USA	deer	SRR5817702	Bruning-Fann et al., 2017
USA	deer	SRR5817704	Bruning-Fann et al., 2017
USA	deer	SRR5817705	Bruning-Fann et al., 2017
USA	bovine	SRR5817706	Trost et al., 2016
USA	deer	SRR5817708	Bruning-Fann et al., 2017
USA	deer	SRR5817713	Bruning-Fann et al., 2017
USA	deer	SRR5817716	Bruning-Fann et al., 2017
USA	deer	SRR5817718	Bruning-Fann et al., 2017
USA	deer	SRR5817719	Bruning-Fann et al., 2017
USA	deer	SRR5817720	Bruning-Fann et al., 2017
USA	human	SRR6930897	Kandler et al., 2018
USA	bovine	SRR7240018	Orloski et al., 2018
USA	bovine	SRR7240023	Orloski et al., 2018
USA	bovine	SRR7240028	Orloski et al., 2018
USA	bovine	SRR7240029	Orloski et al., 2018
USA	bovine	SRR7240034	Orloski et al., 2018
USA	bovine	SRR7240046	Orloski et al., 2018
USA	bovine	SRR7240050	Orloski et al., 2018
USA	bovine	SRR7240051	Orloski et al., 2018
USA	bovine	SRR7240053	Orloski et al., 2018
USA	bovine	SRR7240054	Orloski et al., 2018
USA	bovine	SRR7240056	Orloski et al., 2018
USA	bovine	SRR7240057	Orloski et al., 2018
USA	bovine	SRR7240058	Orloski et al., 2018
USA	bovine	SRR7240059	Orloski et al., 2018
USA	bovine	SRR7240060	Orloski et al., 2018
USA	bovine	SRR7240061	Orloski et al., 2018
USA	bovine	SRR7240073	Orloski et al., 2018
USA	bovine	SRR7240074	Orloski et al., 2018
USA	bovine	SRR7240075	Orloski et al., 2018
USA	bovine	SRR7240076	Orloski et al., 2018
USA	bovine	SRR7240077	Orloski et al., 2018
USA	bovine	SRR7240078	Orloski et al., 2018
USA	bovine	SRR7240079	Orloski et al., 2018
USA	bovine	SRR7240080	Orloski et al., 2018
USA	bovine	SRR7240081	Orloski et al., 2018
USA	bovine	SRR7240082	Orloski et al., 2018
USA	bovine	SRR7240085	Orloski et al., 2018
USA	bovine	SRR7240086	Orloski et al., 2018
USA	bovine	SRR7240088	Orloski et al., 2018
USA	bovine	SRR7240089	Orloski et al., 2018
USA	bovine	SRR7240090	Orloski et al., 2018
USA	bovine	SRR7240091	Orloski et al., 2018
USA	bovine	SRR7240093	Orloski et al., 2018
USA	bovine	SRR7240095	Orloski et al., 2018
USA	bovine	SRR7240096	Orloski et al., 2018
USA	bovine	SRR7240097	Orloski et al., 2018
USA	bovine	SRR7240098	Orloski et al., 2018
USA	bovine	SRR7240099	Orloski et al., 2018
USA	bovine	SRR7240100	Orloski et al., 2018
USA	bovine	SRR7240101	Orloski et al., 2018
USA	bovine	SRR7240102	Orloski et al., 2018
USA	bovine	SRR7240103	Orloski et al., 2018
USA	bovine	SRR7240106	Orloski et al., 2018
USA	bovine	SRR7240111	Orloski et al., 2018
USA	bovine	SRR7240112	Orloski et al., 2018
USA	bovine	SRR7240114	Orloski et al., 2018
USA	bovine	SRR7240115	Orloski et al., 2018
USA	bovine	SRR7240116	Orloski et al., 2018
USA	bovine	SRR7240117	Orloski et al., 2018
USA	bovine	SRR7240118	Orloski et al., 2018
USA	bovine	SRR7240119	Orloski et al., 2018
USA	bovine	SRR7240123	Orloski et al., 2018
USA	bovine	SRR7240125	Orloski et al., 2018
USA	bovine	SRR7240129	Orloski et al., 2018
USA	bovine	SRR7240132	Orloski et al., 2018
USA	bovine	SRR7240133	Orloski et al., 2018
USA	bovine	SRR7240134	Orloski et al., 2018
USA	bovine	SRR7240135	Orloski et al., 2018
USA	bovine	SRR7240136	Orloski et al., 2018
USA	bovine	SRR7240137	Orloski et al., 2018
USA	bovine	SRR7240138	Orloski et al., 2018
USA	bovine	SRR7240139	Orloski et al., 2018
USA	bovine	SRR7240140	Orloski et al., 2018
USA	bovine	SRR7240143	Orloski et al., 2018
USA	bovine	SRR7240145	Orloski et al., 2018
USA	bovine	SRR7240149	Orloski et al., 2018
USA	bovine	SRR7240152	Orloski et al., 2018
USA	bovine	SRR7240153	Orloski et al., 2018
USA	bovine	SRR7240155	Orloski et al., 2018
USA	bovine	SRR7240166	Orloski et al., 2018
USA	bovine	SRR7240203	Orloski et al., 2018
USA	bovine	SRR7240205	Orloski et al., 2018
USA	bovine	SRR7240220	Orloski et al., 2018
USA	bovine	SRR7240222	Orloski et al., 2018
USA	bovine	SRR7240223	Orloski et al., 2018
USA	bovine	SRR7240225	Orloski et al., 2018
USA	bovine	SRR7240227	Orloski et al., 2018
USA	bovine	SRR7240229	Orloski et al., 2018
USA	bovine	SRR7240231	Orloski et al., 2018
USA	bovine	SRR7240232	Orloski et al., 2018
USA	bovine	SRR7240236	Orloski et al., 2018
USA	bovine	SRR7240242	Orloski et al., 2018
USA	bovine	SRR7240243	Orloski et al., 2018
USA	bovine	SRR7240244	Orloski et al., 2018
USA	bovine	SRR7240245	Orloski et al., 2018
USA	bovine	SRR7240246	Orloski et al., 2018
USA	bovine	SRR7240247	Orloski et al., 2018
USA	bovine	SRR7240249	Orloski et al., 2018
USA	bovine	SRR7240250	Orloski et al., 2018
USA	bovine	SRR7240251	Orloski et al., 2018
USA	bovine	SRR7240252	Orloski et al., 2018
USA	bovine	SRR7240253	Orloski et al., 2018
USA	bovine	SRR7240254	Orloski et al., 2018
USA	bovine	SRR7240256	Orloski et al., 2018
USA	bovine	SRR7240257	Orloski et al., 2018
USA	bovine	SRR7240260	Orloski et al., 2018
USA	bovine	SRR7240271	Orloski et al., 2018
USA	bovine	SRR7240284	Orloski et al., 2018
USA	bovine	SRR7240287	Orloski et al., 2018
USA	bovine	SRR7240291	Orloski et al., 2018
USA	bovine	SRR7240293	Orloski et al., 2018
USA	bovine	SRR7240294	Orloski et al., 2018
USA	bovine	SRR7240297	Orloski et al., 2018
USA	bovine	SRR7240298	Orloski et al., 2018
USA	bovine	SRR7240303	Orloski et al., 2018
USA	bovine	SRR7240307	Orloski et al., 2018
USA	bovine	SRR7240310	Orloski et al., 2018
USA	bovine	SRR7240311	Orloski et al., 2018
USA	bovine	SRR7240314	Orloski et al., 2018
USA	bovine	SRR7240316	Orloski et al., 2018
USA	bovine	SRR7240317	Orloski et al., 2018
USA	bovine	SRR7240325	Orloski et al., 2018
USA	bovine	SRR7240339	Orloski et al., 2018
USA	bovine	SRR7240354	Orloski et al., 2018
USA	bovine	SRR7240355	Orloski et al., 2018
USA	bovine	SRR7240356	Orloski et al., 2018
USA	bovine	SRR7240357	Orloski et al., 2018
USA	bovine	SRR7240368	Orloski et al., 2018
USA	bovine	SRR7240379	Orloski et al., 2018
USA	bovine	SRR7240383	Orloski et al., 2018
USA	bovine	SRR7240384	Orloski et al., 2018
USA	bovine	SRR7240387	Orloski et al., 2018
USA	bovine	SRR7240393	Orloski et al., 2018
USA	bovine	SRR7240394	Orloski et al., 2018
USA	bovine	SRR7240405	Orloski et al., 2018
USA	bovine	SRR7240406	Orloski et al., 2018
USA	bovine	SRR7240407	Orloski et al., 2018
USA	bovine	SRR7240408	Orloski et al., 2018
USA	bovine	SRR7240419	Orloski et al., 2018
USA	bovine	SRR7240427	Orloski et al., 2018
USA	bovine	SRR7240428	Orloski et al., 2018
USA	bovine	SRR7240430	Orloski et al., 2018
USA	bovine	SRR7240431	Orloski et al., 2018
USA	bovine	SRR7240432	Orloski et al., 2018
USA	bovine	SRR7240433	Orloski et al., 2018
USA	bovine	SRR7240436	Orloski et al., 2018
USA	bovine	SRR7240437	Orloski et al., 2018
USA	bovine	SRR7240438	Orloski et al., 2018
USA	bovine	SRR7240439	Orloski et al., 2018
USA	bovine	SRR7240443	Orloski et al., 2018
USA	bovine	SRR7240451	Orloski et al., 2018
USA	bovine	SRR7240452	Orloski et al., 2018
USA	bovine	SRR7240456	Orloski et al., 2018
USA	bovine	SRR7240457	Orloski et al., 2018
USA	bovine	SRR7240461	Orloski et al., 2018
USA	bovine	SRR7240468	Orloski et al., 2018
USA	bovine	SRR7240469	Orloski et al., 2018
USA	bovine	SRR7240471	Orloski et al., 2018
USA	bovine	SRR7240473	Orloski et al., 2018
USA	bovine	SRR7240474	Orloski et al., 2018
USA	bovine	SRR7240480	Orloski et al., 2018
USA	bovine	SRR7240496	Orloski et al., 2018
USA	bovine	SRR7240510	Orloski et al., 2018
USA	bovine	SRR7240511	Orloski et al., 2018
USA	bovine	SRR7240512	Orloski et al., 2018
USA	bovine	SRR7240513	Orloski et al., 2018
USA	bovine	SRR7240514	Orloski et al., 2018
USA	bovine	SRR7240515	Orloski et al., 2018
USA	bovine	SRR7240517	Orloski et al., 2018
USA	bovine	SRR7240520	Orloski et al., 2018
USA	bovine	SRR7240521	Orloski et al., 2018
USA	bovine	SRR7240522	Orloski et al., 2018
USA	bovine	SRR7240523	Orloski et al., 2018
USA	bovine	SRR7240524	Orloski et al., 2018
USA	bovine	SRR7240525	Orloski et al., 2018
USA	bovine	SRR7240545	Orloski et al., 2018
USA	bovine	SRR7240546	Orloski et al., 2018
USA	bovine	SRR7240550	Orloski et al., 2018
USA	bovine	SRR7240696	Orloski et al., 2018
USA	bovine	SRR7240698	Orloski et al., 2018
USA	deer	SRR5817671	Bruning-Fann et al., 2017
USA	deer	SRR5817672	Bruning-Fann et al., 2017
USA	bobcat	SRR1791694	Pattané et al., 2017
USA	bovine	SRR1791695	Orloski et al., 2018
USA	bovine	SRR1791716	USDA-NVSL-DBL
USA	bovine	SRR1791730	USDA-NVSL-DBL
USA	bovine	SRR1791734	Orloski et al., 2018
USA	bovine	SRR1791738	Trost et al., 2016
USA	bovine	SRR1791746	Orloski et al., 2018
USA	bovine	SRR1791769	Orloski et al., 2018
USA	bovine	SRR1791803	Martinez et al., 2008
USA	bovine	SRR1791810	USDA-NVSL-DBL
USA	bovine	SRR1791812	USDA-NVSL-DBL
USA	bovine	SRR1791817	USDA-NVSL-DBL
USA	bovine	SRR1791818	USDA-NVSL-DBL
USA	bovine	SRR1791841	Orloski et al., 2018
USA	bovine	SRR1791857	USDA-NVSL-DBL
USA	bovine	SRR1791860	Orloski et al., 2018
USA	bovine	SRR1791866	Orloski et al., 2018
USA	bovine	SRR1791867	Orloski et al., 2018
USA	bovine	SRR1791868	Orloski et al., 2018
USA	bovine	SRR1791869	Orloski et al., 2018
USA	bovine	SRR1791874	USDA-NVSL-DBL
USA	bovine	SRR1791875	Orloski et al., 2018
USA	bovine	SRR1791876	Orloski et al., 2018
USA	bovine	SRR1791880	Orloski et al., 2018
USA	bovine	SRR1791906	Orloski et al., 2018
USA	bovine	SRR1791934	Orloski et al., 2018
USA	bovine	SRR1791994	Orloski et al., 2018
USA	bovine	SRR1792019	USDA-NVSL-DBL
USA	bovine	SRR1792042	Orloski et al., 2018
USA	bovine	SRR1792050	Joshi et al., 2012
USA	bovine	SRR1792110	Orloski et al., 2018
USA	bovine	SRR1792122	Orloski et al., 2018
USA	bovine	SRR1792180	Orloski et al., 2018
USA	bovine	SRR1792250	Orloski et al., 2018
USA	bovine	SRR1792256	USDA-NVSL-DBL
USA	bovine	SRR1792257	USDA-NVSL-DBL
USA	bovine	SRR1792260	Orloski et al., 2018
USA	bovine	SRR1792273	Orloski et al., 2018
USA	bovine	SRR1792276	Orloski et al., 2018
USA	bovine	SRR1792290	USDA-NVSL-DBL
USA	bovine	SRR1792292	Orloski et al., 2018
USA	bovine	SRR1792294	Orloski et al., 2018
USA	bovine	SRR1792297	Orloski et al., 2018
USA	bovine	SRR1792314	Orloski et al., 2018
USA	bovine	SRR1792315	Orloski et al., 2018
USA	bovine	SRR1792319	Orloski et al., 2018
USA	bovine	SRR1792327	Orloski et al., 2018
USA	bovine	SRR1792334	Orloski et al., 2018
USA	bovine	SRR1792338	Orloski et al., 2018
USA	bovine	SRR1792373	USDA-NVSL-DBL
USA	bovine	SRR1792374	USDA-NVSL-DBL
USA	bovine	SRR1792375	USDA-NVSL-DBL
USA	bovine	SRR1792377	USDA-NVSL-DBL
USA	bovine	SRR1792383	USDA-NVSL-DBL
USA	bovine	SRR1792397	USDA-NVSL-DBL
USA	bovine	SRR1792400	USDA-NVSL-DBL
USA	bovine	SRR1792404	USDA-NVSL-DBL
USA	bovine	SRR1792405	USDA-NVSL-DBL
USA	bovine	SRR1792408	USDA-NVSL-DBL
USA	bovine	SRR1792411	Orloski et al., 2018
USA	bovine	SRR1792433	USDA-NVSL-DBL
USA	bovine	SRR1792436	USDA-NVSL-DBL
USA	bovine	SRR1792443	Orloski et al., 2018
USA	bovine	SRR1792448	Orloski et al., 2018
USA	bovine	SRR1792455	USDA-NVSL-DBL
USA	bovine	SRR1792469	USDA-NVSL-DBL
USA	bovine	SRR1792485	Orloski et al., 2018
USA	bovine	SRR1792491	Orloski et al., 2018
USA	bovine	SRR1792502	Orloski et al., 2018
USA	bovine	SRR1792510	USDA-NVSL-DBL
USA	bovine	SRR3091235	USDA-NVSL-DBL
USA	bovine	SRR3091238	USDA-NVSL-DBL
USA	bovine	SRR3091239	USDA-NVSL-DBL
USA	bovine	SRR3091243	USDA-NVSL-DBL
USA	bovine	SRR3091247	USDA-NVSL-DBL
USA	bovine	SRR3091250	USDA-NVSL-DBL
USA	bovine	SRR3091253	USDA-NVSL-DBL
USA	bovine	SRR5485729	Orloski et al., 2018
USA	cervid	SRR1791692	Orloski et al., 2018
USA	cervid	SRR1792142	Orloski et al., 2018
USA	cervid	SRR1792161	Orloski et al., 2018
USA	cervid	SRR1792189	Orloski et al., 2018
USA	cervid	SRR1792190	Orloski et al., 2018
USA	cervid	SRR1792200	Orloski et al., 2018
USA	cervid	SRR1792206	Orloski et al., 2018
USA	cervid	SRR1792208	Orloski et al., 2018
USA	cervid	SRR1792210	Orloski et al., 2018
USA	cervid	SRR1792212	Orloski et al., 2018
USA	cervid	SRR1792215	Orloski et al., 2018
USA	cervid	SRR1792220	Orloski et al., 2018
USA	cervid	SRR1792222	Orloski et al., 2018
USA	cervid	SRR1792226	Orloski et al., 2018
USA	cervid	SRR1792228	Orloski et al., 2018
USA	cervid	SRR1792229	Orloski et al., 2018
USA	cervid	SRR1792231	Orloski et al., 2018
USA	cervid	SRR1792233	Orloski et al., 2018
USA	cervid	SRR1792236	Orloski et al., 2018
USA	cervid	SRR1792239	Orloski et al., 2018
USA	cervid	SRR1792262	USDA-NVSL-DBL
USA	cervid	SRR1792382	Pattané et al., 2017
USA	cervid	SRR1792472	Orloski et al., 2018
USA	cervid	SRR1792473	Orloski et al., 2018
USA	cervid	SRR1792474	Orloski et al., 2018
USA	cervid	SRR1792479	Orloski et al., 2018
USA	cervid	SRR1792480	Orloski et al., 2018
USA	cervid	SRR1792484	Orloski et al., 2018
USA	cervid	SRR1792493	Orloski et al., 2018
USA	cervid	SRR1792498	Orloski et al., 2018
USA	cervid	SRR1792505	Orloski et al., 2018
USA	cervid	SRR3091232	USDA-NVSL-DBL
USA	cervid	SRR3091233	USDA-NVSL-DBL
USA	cervid	SRR3091255	Orloski et al., 2018
USA	cervid	SRR3091256	USDA-NVSL-DBL
USA	cervid	SRR5817668	USDA-NVSL-DBL
USA	cervid	SRR5817683	USDA-NVSL-DBL
USA	cervid	SRR5817684	USDA-NVSL-DBL
USA	cervid	SRR5817685	USDA-NVSL-DBL
USA	cervid	SRR5817686	USDA-NVSL-DBL
USA	cervid	SRR5817687	USDA-NVSL-DBL
USA	cervid	SRR5817689	USDA-NVSL-DBL
USA	cervid	SRR5817691	USDA-NVSL-DBL
USA	cervid	SRR5817697	USDA-NVSL-DBL
USA	cervid	SRR5817701	USDA-NVSL-DBL
USA	cervid	SRR5817703	USDA-NVSL-DBL
USA	cervid	SRR5817709	USDA-NVSL-DBL
USA	cervid	SRR5817710	USDA-NVSL-DBL
USA	cervid	SRR5817714	USDA-NVSL-DBL
USA	coyote	SRR4019492	Pattané et al., 2017
USA	elk	SRR5817673	USDA-NVSL-DBL
USA	elk	SRR5817681	USDA-NVSL-DBL
USA	elk	SRR5817690	USDA-NVSL-DBL
USA	elk	SRR5817711	USDA-NVSL-DBL
USA	felis catus	SRR1792350	Orloski et al., 2018
USA	felis catus	SRR1792460	USDA-NVSL-DBL
USA	felis catus	SRR1792466	USDA-NVSL-DBL
USA	human	SRR4019490	Pattané et al., 2017
USA	jaguar	SRR1791707	Orloski et al., 2018
USA	opossum	SRR1792054	USDA-NVSL-DBL
USA	opossum	SRR1792055	USDA-NVSL-DBL
USA	opossum	SRR1792056	USDA-NVSL-DBL
USA	opossum	SRR1792057	USDA-NVSL-DBL
USA	opossum	SRR1792058	USDA-NVSL-DBL
USA	opossum	SRR1792242	Pattané et al., 2017
USA	opossum	SRR1792323	USDA-NVSL-DBL
USA	opossum	SRR1792324	Pattané et al., 2017
USA	opossum	SRR1792428	Orloski et al., 2018
USA	raccoon	SRR1792021	Pattané et al., 2017
USA	raccoon	SRR1792032	USDA-NVSL-DBL
USA	raccoon	SRR1792053	Pattané et al., 2017
USA	raccoon	SRR1792160	USDA-NVSL-DBL
USA	raccoon	SRR1792426	USDA-NVSL-DBL
USA	raccoon	SRR1792431	USDA-NVSL-DBL
USA	raccoon	SRR1792452	USDA-NVSL-DBL
USA	susscrofa	SRR1791889	Orloski et al., 2018
USA	susscrofa	SRR1792014	Orloski et al., 2018
USA	susscrofa	SRR1792107	Orloski et al., 2018
USA	susscrofa	SRR1792146	Orloski et al., 2018
USA	susscrofa	SRR1792152	Orloski et al., 2018
USA	susscrofa	SRR1792159	Orloski et al., 2018
USA	bovine	SRR1791693	USDA-NVSL-DBL
USA	bovine	SRR1791754	Orloski et al., 2018
USA	bovine	SRR1791808	Salvador et al., 2019
USA	bovine	SRR1791813	Orloski et al., 2018
USA	bovine	SRR1791814	Trost et al., 2016
USA	bovine	SRR1791827	Orloski et al., 2018
USA	bovine	SRR1791839	Trost et al., 2016
USA	bovine	SRR1791840	Trost et al., 2016
USA	bovine	SRR1791849	Trost et al., 2016
USA	bovine	SRR1791856	Trost et al., 2016
USA	bovine	SRR1791905	Trost et al., 2016
USA	bovine	SRR1791914	Orloski et al., 2018
USA	bovine	SRR1791919	Orloski et al., 2018
USA	bovine	SRR1791922	Orloski et al., 2018
USA	bovine	SRR1791925	Salvador et al., 2019
USA	bovine	SRR1791930	Trost et al., 2016
USA	bovine	SRR1791944	Orloski et al., 2018
USA	bovine	SRR1791979	Orloski et al., 2018
USA	bovine	SRR1791980	Orloski et al., 2018
USA	bovine	SRR1791981	Orloski et al., 2018
USA	bovine	SRR1791984	Orloski et al., 2018
USA	bovine	SRR1791985	Orloski et al., 2018
USA	bovine	SRR1791996	Salvador et al., 2019
USA	bovine	SRR1791997	Dippenaar et al., 2016
USA	bovine	SRR1792007	Orloski et al., 2018
USA	cervid	SRR1792044	Orloski et al., 2018
USA	cervid	SRR1792048	Trost et al., 2016
USA	cervid	SRR1792049	Orloski et al., 2018
USA	bovine	SRR1792051	Orloski et al., 2018
USA	cervid	SRR1792062	Orloski et al., 2018
USA	cervid	SRR1792067	Orloski et al., 2018
USA	bovine	SRR1792075	Orloski et al., 2018
USA	cervid	SRR1792076	Orloski et al., 2018
USA	bovine	SRR1792080	Orloski et al., 2018
USA	bovine	SRR1792081	Trost et al., 2016
USA	bovine	SRR1792082	Orloski et al., 2018
USA	bovine	SRR1792084	Orloski et al., 2018
USA	bovine	SRR1792085	Orloski et al., 2018
USA	bovine	SRR1792091	Orloski et al., 2018
USA	bovine	SRR1792092	Orloski et al., 2018
USA	bovine	SRR1792093	Orloski et al., 2018
USA	cervid	SRR1792097	Orloski et al., 2018
USA	cervid	SRR1792103	Orloski et al., 2018
USA	cervid	SRR1792104	Salvador et al., 2019
USA	bovine	SRR1792108	Orloski et al., 2018
USA	bovine	SRR1792112	Trost et al., 2016
USA	bovine	SRR1792114	Trost et al., 2016
USA	cervid	SRR1792119	Orloski et al., 2018
USA	cervid	SRR1792144	Orloski et al., 2018
USA	cervid	SRR1792145	Orloski et al., 2018
USA	bovine	SRR1792167	Glaser et al., 2016
USA	bovine	SRR1792168	Glaser et al., 2016
USA	bovine	SRR1792182	Orloski et al., 2018
USA	cervid	SRR1792192	Trost et al., 2016
USA	bovine	SRR1792195	Orloski et al., 2018
USA	cervid	SRR1792199	Orloski et al., 2018
USA	bovine	SRR1792203	Orloski et al., 2018
USA	bovine	SRR1792204	Orloski et al., 2018
USA	cervid	SRR1792244	Orloski et al., 2018
USA	bovine	SRR1792283	Orloski et al., 2018
USA	bovine	SRR1792284	Orloski et al., 2018
USA	bovine	SRR1792320	Orloski et al., 2018
USA	bovine	SRR1792321	Orloski et al., 2018
USA	bovine	SRR1792322	Orloski et al., 2018
USA	bovine	SRR1792341	Orloski et al., 2018
USA	bovine	SRR1792361	Orloski et al., 2018
USA	bovine	SRR1792364	Orloski et al., 2018
USA	bovine	SRR1792366	Orloski et al., 2018
USA	bovine	SRR1792367	Trost et al., 2016
USA	bovine	SRR1792368	Trost et al., 2016
USA	bovine	SRR1792370	Trost et al., 2016
USA	bovine	SRR1792379	Trost et al., 2016
USA	bovine	SRR1792386	Trost et al., 2016
USA	bovine	SRR1792387	USDA-NVSL-DBL
USA	bovine	SRR1792393	Trost et al., 2016
USA	bovine	SRR1792394	USDA-NVSL-DBL
USA	bovine	SRR1792414	Orloski et al., 2018
USA	bovine	SRR1792451	USDA-NVSL-DBL
USA	bovine	SRR1792458	USDA-NVSL-DBL
USA	bovine	SRR1792465	USDA-NVSL-DBL
USA	felis catus	SRR1792466	Salvador et al., 2019
USA	bovine	SRR1792467	Salvador et al., 2019
USA	bovine	SRR1792471	USDA-NVSL-DBL
USA	bovine	SRR1792504	Orloski et al., 2018
USA	bovine	SRR1792508	USDA-NVSL-DBL
USA	bovine	SRR3091236	USDA-NVSL-DBL
USA	bovine	SRR3091242	USDA-NVSL-DBL
USA	bovine	SRR3091245	USDA-NVSL-DBL
USA	bovine	SRR3091248	USDA-NVSL-DBL
USA	bovine	SRR3091251	USDA-NVSL-DBL
USA	bovine	SRR3091252	USDA-NVSL-DBL
USA	bovine	SRR5817674	Bruning-Fann et al., 2017
USA	deer	SRR5817680	Bruning-Fann et al., 2017
USA	deer	SRR5817695	Bruning-Fann et al., 2017
USA	bovine	SRR5817696	Trost et al., 2016
USA	bovine	SRR5817717	Bruning-Fann et al., 2017
USA	bovine	SRR7240014	Orloski et al., 2018
USA	bovine	SRR7240015	Orloski et al., 2018
USA	bovine	SRR7240022	Orloski et al., 2018
USA	bovine	SRR7240024	Orloski et al., 2018
USA	bovine	SRR7240025	Orloski et al., 2018
USA	bovine	SRR7240027	Orloski et al., 2018
USA	bovine	SRR7240030	Orloski et al., 2018
USA	bovine	SRR7240032	Orloski et al., 2018
USA	bovine	SRR7240035	Orloski et al., 2018
USA	bovine	SRR7240037	Orloski et al., 2018
USA	bovine	SRR7240040	Orloski et al., 2018
USA	bovine	SRR7240041	Orloski et al., 2018
USA	bovine	SRR7240042	Orloski et al., 2018
USA	bovine	SRR7240043	Orloski et al., 2018
USA	bovine	SRR7240048	Orloski et al., 2018
USA	bovine	SRR7240049	Orloski et al., 2018
USA	bovine	SRR7240052	Orloski et al., 2018
USA	bovine	SRR7240055	Orloski et al., 2018
USA	bovine	SRR7240062	Orloski et al., 2018
USA	bovine	SRR7240087	Orloski et al., 2018
USA	bovine	SRR7240092	Orloski et al., 2018
USA	bovine	SRR7240094	Orloski et al., 2018
USA	bovine	SRR7240110	Orloski et al., 2018
USA	bovine	SRR7240120	Orloski et al., 2018
USA	bovine	SRR7240121	Orloski et al., 2018
USA	bovine	SRR7240124	Orloski et al., 2018
USA	bovine	SRR7240126	Orloski et al., 2018
USA	bovine	SRR7240128	Orloski et al., 2018
USA	bovine	SRR7240130	Orloski et al., 2018
USA	bovine	SRR7240131	Orloski et al., 2018
USA	bovine	SRR7240142	Orloski et al., 2018
USA	bovine	SRR7240146	Orloski et al., 2018
USA	bovine	SRR7240150	Orloski et al., 2018
USA	bovine	SRR7240151	Orloski et al., 2018
USA	bovine	SRR7240154	Orloski et al., 2018
USA	bovine	SRR7240167	Orloski et al., 2018
USA	bovine	SRR7240168	Orloski et al., 2018
USA	bovine	SRR7240169	Orloski et al., 2018
USA	bovine	SRR7240171	Orloski et al., 2018
USA	bovine	SRR7240172	Orloski et al., 2018
USA	bovine	SRR7240173	Orloski et al., 2018
USA	bovine	SRR7240174	Orloski et al., 2018
USA	bovine	SRR7240175	Orloski et al., 2018
USA	bovine	SRR7240176	Orloski et al., 2018
USA	bovine	SRR7240182	Orloski et al., 2018
USA	bovine	SRR7240183	Orloski et al., 2018
USA	bovine	SRR7240185	Orloski et al., 2018
USA	bovine	SRR7240186	Orloski et al., 2018
USA	bovine	SRR7240188	Orloski et al., 2018
USA	bovine	SRR7240189	Orloski et al., 2018
USA	bovine	SRR7240190	Orloski et al., 2018
USA	bovine	SRR7240191	Orloski et al., 2018
USA	bovine	SRR7240194	Orloski et al., 2018
USA	bovine	SRR7240198	Orloski et al., 2018
USA	bovine	SRR7240199	Orloski et al., 2018
USA	bovine	SRR7240216	Orloski et al., 2018
USA	bovine	SRR7240217	Orloski et al., 2018
USA	bovine	SRR7240218	Orloski et al., 2018
USA	bovine	SRR7240224	Orloski et al., 2018
USA	bovine	SRR7240226	Orloski et al., 2018
USA	bovine	SRR7240228	Orloski et al., 2018
USA	bovine	SRR7240230	Orloski et al., 2018
USA	bovine	SRR7240235	Orloski et al., 2018
USA	bovine	SRR7240239	Orloski et al., 2018
USA	bovine	SRR7240241	Orloski et al., 2018
USA	bovine	SRR7240248	Orloski et al., 2018
USA	bovine	SRR7240255	Orloski et al., 2018
USA	bovine	SRR7240258	Orloski et al., 2018
USA	bovine	SRR7240261	Orloski et al., 2018
USA	bovine	SRR7240262	Orloski et al., 2018
USA	bovine	SRR7240263	Orloski et al., 2018
USA	bovine	SRR7240264	Orloski et al., 2018
USA	bovine	SRR7240265	Orloski et al., 2018
USA	bovine	SRR7240266	Orloski et al., 2018
USA	bovine	SRR7240267	Orloski et al., 2018
USA	bovine	SRR7240268	Orloski et al., 2018
USA	bovine	SRR7240269	Orloski et al., 2018
USA	bovine	SRR7240272	Orloski et al., 2018
USA	bovine	SRR7240273	Orloski et al., 2018
USA	bovine	SRR7240274	Orloski et al., 2018
USA	bovine	SRR7240275	Orloski et al., 2018
USA	bovine	SRR7240276	Orloski et al., 2018
USA	bovine	SRR7240277	Orloski et al., 2018
USA	bovine	SRR7240278	Orloski et al., 2018
USA	bovine	SRR7240279	Orloski et al., 2018
USA	bovine	SRR7240280	Orloski et al., 2018
USA	bovine	SRR7240281	Orloski et al., 2018
USA	bovine	SRR7240285	Orloski et al., 2018
USA	bovine	SRR7240288	Orloski et al., 2018
USA	bovine	SRR7240304	Orloski et al., 2018
USA	bovine	SRR7240306	Orloski et al., 2018
USA	bovine	SRR7240308	Orloski et al., 2018
USA	bovine	SRR7240309	Orloski et al., 2018
USA	bovine	SRR7240312	Orloski et al., 2018
USA	bovine	SRR7240313	Orloski et al., 2018
USA	bovine	SRR7240329	Orloski et al., 2018
USA	bovine	SRR7240330	Orloski et al., 2018
USA	bovine	SRR7240331	Orloski et al., 2018
USA	bovine	SRR7240332	Orloski et al., 2018
USA	bovine	SRR7240333	Orloski et al., 2018
USA	bovine	SRR7240334	Orloski et al., 2018
USA	bovine	SRR7240335	Orloski et al., 2018
USA	bovine	SRR7240336	Orloski et al., 2018
USA	bovine	SRR7240337	Orloski et al., 2018
USA	bovine	SRR7240338	Orloski et al., 2018
USA	bovine	SRR7240363	Orloski et al., 2018
USA	bovine	SRR7240364	Orloski et al., 2018
USA	bovine	SRR7240365	Orloski et al., 2018
USA	bovine	SRR7240366	Orloski et al., 2018
USA	bovine	SRR7240367	Orloski et al., 2018
USA	bovine	SRR7240369	Orloski et al., 2018
USA	bovine	SRR7240370	Orloski et al., 2018
USA	bovine	SRR7240373	Orloski et al., 2018
USA	bovine	SRR7240374	Orloski et al., 2018
USA	bovine	SRR7240380	Orloski et al., 2018
USA	bovine	SRR7240381	Orloski et al., 2018
USA	bovine	SRR7240382	Orloski et al., 2018
USA	bovine	SRR7240409	Orloski et al., 2018
USA	bovine	SRR7240410	Orloski et al., 2018
USA	bovine	SRR7240411	Orloski et al., 2018
USA	bovine	SRR7240412	Orloski et al., 2018
USA	bovine	SRR7240413	Orloski et al., 2018
USA	bovine	SRR7240414	Orloski et al., 2018
USA	bovine	SRR7240415	Orloski et al., 2018
USA	bovine	SRR7240416	Orloski et al., 2018
USA	bovine	SRR7240418	Orloski et al., 2018
USA	bovine	SRR7240422	Orloski et al., 2018
USA	bovine	SRR7240429	Orloski et al., 2018
USA	bovine	SRR7240459	Orloski et al., 2018
USA	bovine	SRR7240460	Orloski et al., 2018
USA	bovine	SRR7240462	Orloski et al., 2018
USA	bovine	SRR7240463	Orloski et al., 2018
USA	bovine	SRR7240464	Orloski et al., 2018
USA	bovine	SRR7240465	Orloski et al., 2018
USA	bovine	SRR7240466	Orloski et al., 2018
USA	bovine	SRR7240467	Orloski et al., 2018
USA	bovine	SRR7240470	Orloski et al., 2018
USA	bovine	SRR7240472	Orloski et al., 2018
USA	bovine	SRR7240475	Orloski et al., 2018
USA	bovine	SRR7240477	Orloski et al., 2018
USA	bovine	SRR7240493	Orloski et al., 2018
USA	bovine	SRR7240494	Orloski et al., 2018
USA	bovine	SRR7240495	Orloski et al., 2018
USA	bovine	SRR7240497	Orloski et al., 2018
USA	bovine	SRR7240516	Orloski et al., 2018
USA	bovine	SRR7240544	Orloski et al., 2018
USA	bovine	SRR7240547	Orloski et al., 2018
USA	bovine	SRR7240548	Orloski et al., 2018
USA	bovine	SRR7240549	Orloski et al., 2018
USA	bovine	SRR7240551	Orloski et al., 2018
USA	bovine	SRR7240694	Orloski et al., 2018
USA	bovine	SRR7240695	Orloski et al., 2018
USA	bovine	SRR7240697	Orloski et al., 2018
USA	bovine	SRR7240699	Orloski et al., 2018
USA	bovine	SRR5817669	Trost et al., 2016
USA	bison	SRR1792457	USDA-NVSL-DBL
USA	bovine	SRR1791715	Orloski et al., 2018
USA	bovine	SRR1791794	Orloski et al., 2018
USA	bovine	SRR1791920	Orloski et al., 2018
USA	bovine	SRR1791935	Orloski et al., 2018
USA	bovine	SRR1791983	Orloski et al., 2018
USA	bovine	SRR1792006	Orloski et al., 2018
USA	bovine	SRR1792009	Orloski et al., 2018
USA	bovine	SRR1792023	USDA-NVSL-DBL
USA	bovine	SRR1792038	Orloski et al., 2018
USA	bovine	SRR1792083	Orloski et al., 2018
USA	bovine	SRR1792086	Orloski et al., 2018
USA	bovine	SRR1792091	Orloski et al., 2018
USA	bovine	SRR1792100	Orloski et al., 2018
USA	bovine	SRR1792115	Orloski et al., 2018
USA	bovine	SRR1792116	Orloski et al., 2018
USA	bovine	SRR1792121	Orloski et al., 2018
USA	bovine	SRR1792147	Orloski et al., 2018
USA	bovine	SRR1792166	Orloski et al., 2018
USA	bovine	SRR1792178	Orloski et al., 2018
USA	bovine	SRR1792183	Orloski et al., 2018
USA	bovine	SRR1792272	USDA-NVSL-DBL
USA	bovine	SRR1792291	Orloski et al., 2018
USA	bovine	SRR1792311	Orloski et al., 2018
USA	bovine	SRR1792337	Orloski et al., 2018
USA	bovine	SRR1792348	Orloski et al., 2018
USA	bovine	SRR1792360	Orloski et al., 2018
USA	bovine	SRR1792362	Orloski et al., 2018
USA	bovine	SRR1792365	Orloski et al., 2018
USA	bovine	SRR1792376	USDA-NVSL-DBL
USA	bovine	SRR1792385	USDA-NVSL-DBL
USA	bovine	SRR1792398	USDA-NVSL-DBL
USA	bovine	SRR1792401	USDA-NVSL-DBL
USA	bovine	SRR1792402	USDA-NVSL-DBL
USA	bovine	SRR1792415	Orloski et al., 2018
USA	bovine	SRR1792418	USDA-NVSL-DBL
USA	bovine	SRR1792419	USDA-NVSL-DBL
USA	bovine	SRR1792420	USDA-NVSL-DBL
USA	bovine	SRR1792456	USDA-NVSL-DBL
USA	bovine	SRR1792464	USDA-NVSL-DBL
USA	bovine	SRR1792467	USDA-NVSL-DBL
USA	bovine	SRR1792470	USDA-NVSL-DBL
USA	bovine	SRR1792483	USDA-NVSL-DBL
USA	bovine	SRR3091237	USDA-NVSL-DBL
USA	bovine	SRR3091240	USDA-NVSL-DBL
USA	bovine	SRR3091241	USDA-NVSL-DBL
USA	bovine	SRR3091244	USDA-NVSL-DBL
USA	bovine	SRR5817675	Martinez et al., 2008
USA	cervid	SRR1792010	Orloski et al., 2018
USA	cervid	SRR1792043	Orloski et al., 2018
USA	cervid	SRR1792061	Orloski et al., 2018
USA	cervid	SRR1792094	Orloski et al., 2018
USA	cervid	SRR1792095	Orloski et al., 2018
USA	cervid	SRR1792102	Orloski et al., 2018
USA	cervid	SRR1792104	Orloski et al., 2018
USA	cervid	SRR1792143	Orloski et al., 2018
USA	cervid	SRR1792149	Orloski et al., 2018
USA	cervid	SRR1792191	Orloski et al., 2018
USA	cervid	SRR1792230	Orloski et al., 2018
USA	cervid	SRR1792496	Orloski et al., 2018
USA	cervid	SRR5817670	USDA-NVSL-DBL
USA	cervid	SRR5817682	USDA-NVSL-DBL
USA	cervid	SRR5817707	USDA-NVSL-DBL
USA	elk	SRR5817712	USDA-NVSL-DBL
USA	felis catus	SRR1792459	USDA-NVSL-DBL
USA	felis catus	SRR1792461	USDA-NVSL-DBL
USA	felis catus	SRR1792462	USDA-NVSL-DBL
USA	felis catus	SRR1792463	USDA-NVSL-DBL
USA	human	SRR6930897	Kandler et al.,2018
USA	raccoon	SRR1792424	USDA-NVSL-DBL
USA	raccoon	SRR1792425	USDA-NVSL-DBL
USA	raccoon	SRR1792427	USDA-NVSL-DBL
USA	raccoon	SRR1792430	USDA-NVSL-DBL
USA	raccoon	SRR1792453	USDA-NVSL-DBL

## Sheet: MTBC genomes
Strains of the Mycobacterium tuberculosis complex used in this study
MTBC	Lineage	ID	Reference
Mycobacterium caprae	Animal tb	ERR1462581	Broeckl et al., 2017
Mycobacterium caprae	Animal tb	ERR1462585	Broeckl et al., 2017
Mycobacterium caprae	Animal tb	ERR1462591	Broeckl et al., 2017
Mycobacterium caprae	Animal tb	ERR1462617	Broeckl et al., 2017
Mycobacterium caprae	Animal tb	ERR1462625	Broeckl et al., 2017
Mycobacterium orygis	Animal tb	ERR017782	Casali et al. 2014
Mycobacterium orygis	Animal tb	SRR10251189	ICAR-INDIAN VETERINARY RESEARCH INSTITUTE
Mycobacterium orygis	Animal tb	SRR10251194	ICAR-INDIAN VETERINARY RESEARCH INSTITUTE
Mycobacterium orygis	Animal tb	SRR10251195	ICAR-INDIAN VETERINARY RESEARCH INSTITUTE
Mycobacterium orygis	Animal tb	SRR5642712	Marcos et al. 2017
Mycobacterium pinnipedii	Animal tb	SRR7693584	Silva-Pereira et al., 2019
Mycobacterium pinnipedii	Animal tb	SRR1239336	Bos et al., 2014
Mycobacterium pinnipedii	Animal tb	SRR1239337	Riojas et al., 2018
Mycobacterium microti	Animaltb	ERR027294	Brites et al .,2018
Mycobacterium microti	Animaltb	ERR027295	Brites et al .,2018
Mycobacterium microti	Animaltb	ERR027297	Menardo et al., 2018
Mycobacterium microti	Animaltb	ERR027298	Menardo et al., 2018
Mycobacterium microti	Animaltb	ERR027299	Sanger Institute
Mycobacterium microti	Animaltb	ERR027300	Sanger Institute
Mycobacterium microti	Animaltb	ERR2659163	Brites et al .,2018
Mycobacterium microti	Animaltb	ERR2659164	Brites et al .,2018
Mycobacterium microti	Animaltb	ERR2659166	Brites et al .,2018
Mycobacterium microti	Animaltb	ERR2659167	Brites et al .,2018
Mycobacterium microti	Animaltb	ERR2659168	Brites et al .,2018
Mycobacterium microti	Animaltb	ERR2659169	Brites et al .,2018
Mycobacterium microti	Animaltb	ERR2659170	Brites et al .,2018
Mycobacterium microti	Animaltb	ERR2659171	Brites et al .,2018
